# Supplementary material for: A Comparison of RNA Interference via Injection and Feeding in Honey Bees
Source: Insects. 2022 Oct 13;13(10):928. doi: 10.3390/insects13100928 (PMC9604379; doi:10.3390/insects13100928)
Supplement: Supplementary file 1 [file insects-13-00928-s001.zip]

Archive with 5 entries (5 files):
- supplementary.pdf
- Table  S2.xlsx
- Table  S3.xlsx
- Table  S4.xlsx
- Table S1.xlsx
