# Supplementary material for: A Comparison of RNA Interference via Injection and Feeding in Honey Bees
Source: Insects. 2022 Oct 13;13(10):928. doi: 10.3390/insects13100928 (PMC9604379; doi:10.3390/insects13100928)
Supplement: Supplementary file 1 [file insects-13-00928-s001.zip › Table S1.xlsx]

## Sheet: Pairwise comparison
Statistical analysis (log-rank test) related to the survival of honey bees delivery of siRNA-ALDH7A1
Comparison	Chi-square	P value
Control vs. Injected-siRNA-ALDH7A1-un(15μg)	1.7699	0.183394
Control vs. Injected-siRNA-ALDH7A1-2'Ome(15μg)	0.093873	0.75931
Control vs. Fed-siRNA-ALDH7A1-un(15μg)	0.869316	0.351145
Control vs. Fed-siRNA-ALDH7A1-2'Ome(15μg)	0.873032	0.350117
Injected-siRNA-ALDH7A1-un(15μg) vs. Injected-siRNA-ALDH7A1-2'Ome(15μg)	1.57453	0.209551
Injected-siRNA-ALDH7A1-un(15μg) vs. Fed-siRNA-ALDH7A1-un(15μg)	0.39231	0.531088
Injected-siRNA-ALDH7A1-un(15μg) vs. Fed-siRNA-ALDH7A1-2'Ome(15μg)	0.393273	0.530584
Injected-siRNA-ALDH7A1-2'Ome(15μg) vs. Fed-siRNA-ALDH7A1-un(15μg)	0.657908	0.4173
Injected-siRNA-ALDH7A1-2'Ome(15μg) vs. Fed-siRNA-ALDH7A1-2'Ome(15μg)	0.655612	0.418114
Fed-siRNA-ALDH7A1-un(15μg) vs. Fed-siRNA-ALDH7A1-2'Ome(15μg)	1.30351e-06	0.999089
Statistical analysis (log-rank test) related to the survival of honey bees delivery of siRNA-4CL
Comparison	Chi-square	P value
Control vs. Injected-siRNA-4CL-un(15μg)	0.444683	0.504871
Control vs. Injected-siRNA-4CL-2'Ome(15μg)	0.566394	0.451695
Control vs. Fed-siRNA-4CL-un(15μg)	0.0983226	0.753852
Control vs. Fed-siRNA-4CL-2'Ome(15μg)	0.113623	0.736057
Injected-siRNA-4CL-un(15μg) vs. Injected-siRNA-4CL-2'Ome(15μg)	0.00115177	0.972927
Injected-siRNA-4CL-un(15μg) vs. Fed-siRNA-4CL-un(15μg)	0.158499	0.690542
Injected-siRNA-4CL-un(15μg) vs. Fed-siRNA-4CL-2'Ome(15μg)	0.185488	0.666699
Injected-siRNA-4CL-2'Ome(15μg) vs. Fed-siRNA-4CL-un(15μg)	0.0996107	0.752297
Injected-siRNA-4CL-2'Ome(15μg) vs. Fed-siRNA-4CL-2'Ome(15μg)	0.146308	0.702089
Fed-siRNA-4CL-un(15μg) vs. Fed-siRNA-4CL-2'Ome(15μg)	0.00869888	0.925691
Statistical analysis (log-rank test) related to the survival of honey bees delivery of siRNA-HSP70
Comparison	Chi-square	P value
Control vs. Injected-siRNA-HSP70-un(15μg)	0.191617	0.661574
Control vs. Injected-siRNA-HSP70-2'Ome(15μg)	0.41365	0.520123
Control vs. Fed-siRNA-HSP70-un(15μg)	0.215021	0.64286
Control vs. Fed-siRNA-HSP70-2'Ome(15μg)	0.0055967	0.940365
Injected-siRNA-HSP70-un(15μg) vs. Injected-siRNA-HSP70-2'Ome(15μg)	0.094724	0.758255
Injected-siRNA-HSP70-un(15μg) vs. Fed-siRNA-HSP70-un(15μg)	1.59651e-06	0.998992
Injected-siRNA-HSP70-un(15μg) vs. Fed-siRNA-HSP70-2'Ome(15μg)	0.216113	0.642018
Injected-siRNA-HSP70-2'Ome(15μg) vs. Fed-siRNA-HSP70-un(15μg)	0.214945	0.642919
Injected-siRNA-HSP70-2'Ome(15μg) vs. Fed-siRNA-HSP70-2'Ome(15μg)	0.572569	0.44924
Fed-siRNA-HSP70-un(15μg) vs. Fed-siRNA-HSP70-2'Ome(15μg)	0.126249	0.722354
