# Supplementary material for: A Comparison of RNA Interference via Injection and Feeding in Honey Bees
Source: Insects. 2022 Oct 13;13(10):928. doi: 10.3390/insects13100928 (PMC9604379; doi:10.3390/insects13100928)
Supplement: Supplementary file 1 [file insects-13-00928-s001.zip › Table S2.xlsx]

## Sheet: Sheet1
Injection(0.5μg)								Feeding(0.5μg)
Time	Group		Difference of means	Standard deviation	P-value			Time	Group		Difference of means	Standard deviation	P-value
8h	siRNA-NC	siRNA-ALDH7A1	0.0184745	0.0917117	0.844833			8h	siRNA-NC	siRNA-ALDH7A1	0.0200245	0.0399101	0.627894
		siRNA-ALDH7A1-2'Ome	-0.0918682	0.0917117	0.342655					siRNA-ALDH7A1-2'Ome	0.0208918	0.0399101	0.613291
	siRNA-ALDH7A1	siRNA-NC	-0.0184745	0.0917117	0.844833				siRNA-ALDH7A1	siRNA-NC	-0.0200245	0.0399101	0.627894
		siRNA-ALDH7A1-2'Ome	-0.110343	0.0917117	0.259612					siRNA-ALDH7A1-2'Ome	0.00086725	0.0399101	0.983137
	siRNA-ALDH7A1-2'Ome	siRNA-NC	0.0918682	0.0917117	0.342655				siRNA-ALDH7A1-2'Ome	siRNA-NC	-0.0208918	0.0399101	0.613291
		siRNA-ALDH7A1	0.110343	0.0917117	0.259612					siRNA-ALDH7A1	-0.00086725	0.0399101	0.983137
16h	siRNA-NC	siRNA-ALDH7A1	.27437*	0.0679467	0.00293726			16h	siRNA-NC	siRNA-ALDH7A1	-0.00454025	0.0379414	0.907377
		siRNA-ALDH7A1-2'Ome	.27309*	0.0679467	0.00302169					siRNA-ALDH7A1-2'Ome	0.0288515	0.0379414	0.466455
	siRNA-ALDH7A1	siRNA-NC	-.27437*	0.0679467	0.00293726				siRNA-ALDH7A1	siRNA-NC	0.00454025	0.0379414	0.907377
		siRNA-ALDH7A1-2'Ome	-0.00127975	0.0679467	0.985384					siRNA-ALDH7A1-2'Ome	0.0333917	0.0379414	0.4017
	siRNA-ALDH7A1-2'Ome	siRNA-NC	-.27309*	0.0679467	0.00302169				siRNA-ALDH7A1-2'Ome	siRNA-NC	-0.0288515	0.0379414	0.466455
		siRNA-ALDH7A1	0.00127975	0.0679467	0.985384					siRNA-ALDH7A1	-0.0333917	0.0379414	0.4017
24h	siRNA-NC	siRNA-ALDH7A1	.62967*	0.0513305	6.38238e-07			24h	siRNA-NC	siRNA-ALDH7A1	-0.0218125	0.0405409	0.6036
		siRNA-ALDH7A1-2'Ome	.67347*	0.0513305	3.58754e-07					siRNA-ALDH7A1-2'Ome	0.0012435	0.0405409	0.9762
	siRNA-ALDH7A1	siRNA-NC	-.62967*	0.0513305	6.38238e-07				siRNA-ALDH7A1	siRNA-NC	0.0218125	0.0405409	0.6036
		siRNA-ALDH7A1-2'Ome	0.043802	0.0513305	0.415607					siRNA-ALDH7A1-2'Ome	0.023056	0.0405409	0.583463
	siRNA-ALDH7A1-2'Ome	siRNA-NC	-.67347*	0.0513305	3.58754e-07				siRNA-ALDH7A1-2'Ome	siRNA-NC	-0.0012435	0.0405409	0.9762
		siRNA-ALDH7A1	-0.043802	0.0513305	0.415607					siRNA-ALDH7A1	-0.023056	0.0405409	0.583463
48h	siRNA-NC	siRNA-ALDH7A1	.65573*	0.0762113	1.23171e-05			48h	siRNA-NC	siRNA-ALDH7A1	-0.0179145	0.0379122	0.647799
		siRNA-ALDH7A1-2'Ome	.68005*	0.0762113	9.1574e-06					siRNA-ALDH7A1-2'Ome	0.0011845	0.0379122	0.975757
	siRNA-ALDH7A1	siRNA-NC	-.65573*	0.0762113	1.23171e-05				siRNA-ALDH7A1	siRNA-NC	0.0179145	0.0379122	0.647799
		siRNA-ALDH7A1-2'Ome	0.0243193	0.0762113	0.75693					siRNA-ALDH7A1-2'Ome	0.019099	0.0379122	0.626523
	siRNA-ALDH7A1-2'Ome	siRNA-NC	-.68005*	0.0762113	9.1574e-06				siRNA-ALDH7A1-2'Ome	siRNA-NC	-0.0011845	0.0379122	0.975757
		siRNA-ALDH7A1	-0.0243193	0.0762113	0.75693					siRNA-ALDH7A1	-0.019099	0.0379122	0.626523
72h	siRNA-NC	siRNA-ALDH7A1	.68609*	0.0624638	1.63015e-06			72h	siRNA-NC	siRNA-ALDH7A1	0.005101	0.0342775	0.884981
		siRNA-ALDH7A1-2'Ome	.67651*	0.0624638	1.83508e-06					siRNA-ALDH7A1-2'Ome	0.0401588	0.0342775	0.271448
	siRNA-ALDH7A1	siRNA-NC	-.68609*	0.0624638	1.63015e-06				siRNA-ALDH7A1	siRNA-NC	-0.005101	0.0342775	0.884981
		siRNA-ALDH7A1-2'Ome	-0.00957705	0.0624638	0.881527					siRNA-ALDH7A1-2'Ome	0.0350577	0.0342775	0.333124
	siRNA-ALDH7A1-2'Ome	siRNA-NC	-.67651*	0.0624638	1.83508e-06				siRNA-ALDH7A1-2'Ome	siRNA-NC	-0.0401588	0.0342775	0.271448
		siRNA-ALDH7A1	0.00957705	0.0624638	0.881527					siRNA-ALDH7A1	-0.0350577	0.0342775	0.333124
Injection(1μg)								Feeding(1μg)
Time	Group		Difference of means	Standard deviation	P-value			Time	Group		Difference of means	Standard deviation	P-value
8h	siRNA-NC	siRNA-ALDH7A1	-0.0113265	0.0797174	0.890144			8h	siRNA-NC	siRNA-ALDH7A1	-0.012084	0.0403438	0.771341
		siRNA-ALDH7A1-2'Ome	-0.0272275	0.0797174	0.740529					siRNA-ALDH7A1-2'Ome	-0.0532212	0.0403438	0.21968
	siRNA-ALDH7A1	siRNA-NC	0.0113265	0.0797174	0.890144				siRNA-ALDH7A1	siRNA-NC	0.012084	0.0403438	0.771341
		siRNA-ALDH7A1-2'Ome	-0.015901	0.0797174	0.846331					siRNA-ALDH7A1-2'Ome	-0.0411372	0.0403438	0.334513
	siRNA-ALDH7A1-2'Ome	siRNA-NC	0.0272275	0.0797174	0.740529				siRNA-ALDH7A1-2'Ome	siRNA-NC	0.0532212	0.0403438	0.21968
		siRNA-ALDH7A1	0.015901	0.0797174	0.846331					siRNA-ALDH7A1	0.0411372	0.0403438	0.334513
16h	siRNA-NC	siRNA-ALDH7A1	.44175*	0.0507192	1.11546e-05			16h	siRNA-NC	siRNA-ALDH7A1	-0.000312	0.0300656	0.991947
		siRNA-ALDH7A1-2'Ome	.41318*	0.0507192	1.91439e-05					siRNA-ALDH7A1-2'Ome	-0.0383472	0.0300656	0.234086
	siRNA-ALDH7A1	siRNA-NC	-.44175*	0.0507192	1.11546e-05				siRNA-ALDH7A1	siRNA-NC	0.000312	0.0300656	0.991947
		siRNA-ALDH7A1-2'Ome	-0.0285753	0.0507192	0.586922					siRNA-ALDH7A1-2'Ome	-0.0380352	0.0300656	0.237617
	siRNA-ALDH7A1-2'Ome	siRNA-NC	-.41318*	0.0507192	1.91439e-05				siRNA-ALDH7A1-2'Ome	siRNA-NC	0.0383472	0.0300656	0.234086
		siRNA-ALDH7A1	0.0285753	0.0507192	0.586922					siRNA-ALDH7A1	0.0380352	0.0300656	0.237617
24h	siRNA-NC	siRNA-ALDH7A1	.90679*	0.0442303	7.29662e-09			24h	siRNA-NC	siRNA-ALDH7A1	-0.040988	0.0507038	0.439716
		siRNA-ALDH7A1-2'Ome	.89427*	0.0442303	8.24992e-09					siRNA-ALDH7A1-2'Ome	0.0484883	0.0507038	0.363899
	siRNA-ALDH7A1	siRNA-NC	-.90679*	0.0442303	7.29662e-09				siRNA-ALDH7A1	siRNA-NC	0.040988	0.0507038	0.439716
		siRNA-ALDH7A1-2'Ome	-0.0125285	0.0442303	0.783388					siRNA-ALDH7A1-2'Ome	0.0894763	0.0507038	0.111436
	siRNA-ALDH7A1-2'Ome	siRNA-NC	-.89427*	0.0442303	8.24992e-09				siRNA-ALDH7A1-2'Ome	siRNA-NC	-0.0484883	0.0507038	0.363899
		siRNA-ALDH7A1	0.0125285	0.0442303	0.783388					siRNA-ALDH7A1	-0.0894763	0.0507038	0.111436
48h	siRNA-NC	siRNA-ALDH7A1	.92346*	0.0596271	8.54337e-08			48h	siRNA-NC	siRNA-ALDH7A1	0.031133	0.0517301	0.562136
		siRNA-ALDH7A1-2'Ome	.94047*	0.0596271	7.28792e-08					siRNA-ALDH7A1-2'Ome	-0.013098	0.0517301	0.805803
	siRNA-ALDH7A1	siRNA-NC	-.92346*	0.0596271	8.54337e-08				siRNA-ALDH7A1	siRNA-NC	-0.031133	0.0517301	0.562136
		siRNA-ALDH7A1-2'Ome	0.0170075	0.0596271	0.781922					siRNA-ALDH7A1-2'Ome	-0.044231	0.0517301	0.414713
	siRNA-ALDH7A1-2'Ome	siRNA-NC	-.94047*	0.0596271	7.28792e-08				siRNA-ALDH7A1-2'Ome	siRNA-NC	0.013098	0.0517301	0.805803
		siRNA-ALDH7A1	-0.0170075	0.0596271	0.781922					siRNA-ALDH7A1	0.044231	0.0517301	0.414713
72h	siRNA-NC	siRNA-ALDH7A1	.91410*	0.0497812	1.92629e-08			72h	siRNA-NC	siRNA-ALDH7A1	0.0309628	0.0471971	0.528218
		siRNA-ALDH7A1-2'Ome	.92291*	0.0497812	1.77047e-08					siRNA-ALDH7A1-2'Ome	0.0268508	0.0471971	0.583336
	siRNA-ALDH7A1	siRNA-NC	-.91410*	0.0497812	1.92629e-08				siRNA-ALDH7A1	siRNA-NC	-0.0309628	0.0471971	0.528218
		siRNA-ALDH7A1-2'Ome	0.008815	0.0497812	0.86337					siRNA-ALDH7A1-2'Ome	-0.004112	0.0471971	0.932481
	siRNA-ALDH7A1-2'Ome	siRNA-NC	-.92291*	0.0497812	1.77047e-08				siRNA-ALDH7A1-2'Ome	siRNA-NC	-0.0268508	0.0471971	0.583336
		siRNA-ALDH7A1	-0.008815	0.0497812	0.86337					siRNA-ALDH7A1	0.004112	0.0471971	0.932481
Injection(2μg)								Feeding(2μg)
Time	Group		Difference of means	Standard deviation	P-value			Time	Group		Difference of means	Standard deviation	P-value
8h	siRNA-NC	siRNA-ALDH7A1	-0.0179227	0.0905534	0.847502			8h	siRNA-NC	siRNA-ALDH7A1	0.0184405	0.0445982	0.688933
		siRNA-ALDH7A1-2'Ome	0.00763425	0.0905534	0.934658					siRNA-ALDH7A1-2'Ome	0.0356113	0.0445982	0.445144
	siRNA-ALDH7A1	siRNA-NC	0.0179227	0.0905534	0.847502				siRNA-ALDH7A1	siRNA-NC	-0.0184405	0.0445982	0.688933
		siRNA-ALDH7A1-2'Ome	0.025557	0.0905534	0.784149					siRNA-ALDH7A1-2'Ome	0.0171708	0.0445982	0.709171
	siRNA-ALDH7A1-2'Ome	siRNA-NC	-0.00763425	0.0905534	0.934658				siRNA-ALDH7A1-2'Ome	siRNA-NC	-0.0356113	0.0445982	0.445144
		siRNA-ALDH7A1	-0.025557	0.0905534	0.784149					siRNA-ALDH7A1	-0.0171708	0.0445982	0.709171
16h	siRNA-NC	siRNA-ALDH7A1	.42253*	0.0834987	0.000680792			16h	siRNA-NC	siRNA-ALDH7A1	-0.0132117	0.0423038	0.761922
		siRNA-ALDH7A1-2'Ome	.46108*	0.0834987	0.000369557					siRNA-ALDH7A1-2'Ome	-0.013076	0.0423038	0.764283
	siRNA-ALDH7A1	siRNA-NC	-.42253*	0.0834987	0.000680792				siRNA-ALDH7A1	siRNA-NC	0.0132117	0.0423038	0.761922
		siRNA-ALDH7A1-2'Ome	0.038549	0.0834987	0.655272					siRNA-ALDH7A1-2'Ome	0.00013575	0.0423038	0.99751
	siRNA-ALDH7A1-2'Ome	siRNA-NC	-.46108*	0.0834987	0.000369557				siRNA-ALDH7A1-2'Ome	siRNA-NC	0.013076	0.0423038	0.764283
		siRNA-ALDH7A1	-0.038549	0.0834987	0.655272					siRNA-ALDH7A1	-0.00013575	0.0423038	0.99751
24h	siRNA-NC	siRNA-ALDH7A1	.93149*	0.0455984	7.53149e-09			24h	siRNA-NC	siRNA-ALDH7A1	0.0699302	0.0321584	0.057684
		siRNA-ALDH7A1-2'Ome	.90965*	0.0455984	9.28582e-09					siRNA-ALDH7A1-2'Ome	0.0478145	0.0321584	0.171226
	siRNA-ALDH7A1	siRNA-NC	-.93149*	0.0455984	7.53149e-09				siRNA-ALDH7A1	siRNA-NC	-0.0699302	0.0321584	0.057684
		siRNA-ALDH7A1-2'Ome	-0.0218465	0.0455984	0.643289					siRNA-ALDH7A1-2'Ome	-0.0221158	0.0321584	0.508968
	siRNA-ALDH7A1-2'Ome	siRNA-NC	-.90965*	0.0455984	9.28582e-09				siRNA-ALDH7A1-2'Ome	siRNA-NC	-0.0478145	0.0321584	0.171226
		siRNA-ALDH7A1	0.0218465	0.0455984	0.643289					siRNA-ALDH7A1	0.0221158	0.0321584	0.508968
48h	siRNA-NC	siRNA-ALDH7A1	.92929*	0.0540071	3.4068e-08			48h	siRNA-NC	siRNA-ALDH7A1	0.016304	0.052314	0.7624
		siRNA-ALDH7A1-2'Ome	.93458*	0.0540071	3.24145e-08					siRNA-ALDH7A1-2'Ome	0.0013525	0.052314	0.979938
	siRNA-ALDH7A1	siRNA-NC	-.92929*	0.0540071	3.4068e-08				siRNA-ALDH7A1	siRNA-NC	-0.016304	0.052314	0.7624
		siRNA-ALDH7A1-2'Ome	0.00529297	0.0540071	0.924076					siRNA-ALDH7A1-2'Ome	-0.0149515	0.052314	0.781498
	siRNA-ALDH7A1-2'Ome	siRNA-NC	-.93458*	0.0540071	3.24145e-08				siRNA-ALDH7A1-2'Ome	siRNA-NC	-0.0013525	0.052314	0.979938
		siRNA-ALDH7A1	-0.00529297	0.0540071	0.924076					siRNA-ALDH7A1	0.0149515	0.052314	0.781498
72h	siRNA-NC	siRNA-ALDH7A1	.90240*	0.0489612	1.86419e-08			72h	siRNA-NC	siRNA-ALDH7A1	-0.055608	0.0669495	0.427685
		siRNA-ALDH7A1-2'Ome	.89969*	0.0489612	1.91406e-08					siRNA-ALDH7A1-2'Ome	0.0136113	0.0669495	0.843418
	siRNA-ALDH7A1	siRNA-NC	-.90240*	0.0489612	1.86419e-08				siRNA-ALDH7A1	siRNA-NC	0.055608	0.0669495	0.427685
		siRNA-ALDH7A1-2'Ome	-0.00270655	0.0489612	0.957124					siRNA-ALDH7A1-2'Ome	0.0692192	0.0669495	0.328163
	siRNA-ALDH7A1-2'Ome	siRNA-NC	-.89969*	0.0489612	1.91406e-08				siRNA-ALDH7A1-2'Ome	siRNA-NC	-0.0136113	0.0669495	0.843418
		siRNA-ALDH7A1	0.00270655	0.0489612	0.957124					siRNA-ALDH7A1	-0.0692192	0.0669495	0.328163
Injection(5μg)								Feeding(5μg)
Time	Group		Difference of means	Standard deviation	P-value			Time	Group		Difference of means	Standard deviation	P-value
8h	siRNA-NC	siRNA-ALDH7A1	0.0181955	0.0615846	0.774349			8h	siRNA-NC	siRNA-ALDH7A1	0.032888	0.0502164	0.528897
		siRNA-ALDH7A1-2'Ome	0.0169425	0.0615846	0.789444					siRNA-ALDH7A1-2'Ome	0.0507613	0.0502164	0.338491
	siRNA-ALDH7A1	siRNA-NC	-0.0181955	0.0615846	0.774349				siRNA-ALDH7A1	siRNA-NC	-0.032888	0.0502164	0.528897
		siRNA-ALDH7A1-2'Ome	-0.001253	0.0615846	0.984211					siRNA-ALDH7A1-2'Ome	0.0178733	0.0502164	0.730097
	siRNA-ALDH7A1-2'Ome	siRNA-NC	-0.0169425	0.0615846	0.789444				siRNA-ALDH7A1-2'Ome	siRNA-NC	-0.0507613	0.0502164	0.338491
		siRNA-ALDH7A1	0.001253	0.0615846	0.984211					siRNA-ALDH7A1	-0.0178733	0.0502164	0.730097
16h	siRNA-NC	siRNA-ALDH7A1	.44926*	0.0388494	1.05458e-06			16h	siRNA-NC	siRNA-ALDH7A1	0.0287863	0.083067	0.736899
		siRNA-ALDH7A1-2'Ome	.50300*	0.0388494	4.02012e-07					siRNA-ALDH7A1-2'Ome	.29890*	0.083067	0.00576309
	siRNA-ALDH7A1	siRNA-NC	-.44926*	0.0388494	1.05458e-06				siRNA-ALDH7A1	siRNA-NC	-0.0287863	0.083067	0.736899
		siRNA-ALDH7A1-2'Ome	0.0537445	0.0388494	0.199888					siRNA-ALDH7A1-2'Ome	.27012*	0.083067	0.00996841
	siRNA-ALDH7A1-2'Ome	siRNA-NC	-.50300*	0.0388494	4.02012e-07				siRNA-ALDH7A1-2'Ome	siRNA-NC	-.29890*	0.083067	0.00576309
		siRNA-ALDH7A1	-0.0537445	0.0388494	0.199888					siRNA-ALDH7A1	-.27012*	0.083067	0.00996841
24h	siRNA-NC	siRNA-ALDH7A1	.88792*	0.0157575	8.78684e-13			24h	siRNA-NC	siRNA-ALDH7A1	-0.004715	0.093963	0.961075
		siRNA-ALDH7A1-2'Ome	.88320*	0.0157575	9.21832e-13					siRNA-ALDH7A1-2'Ome	.55472*	0.093963	0.000228063
	siRNA-ALDH7A1	siRNA-NC	-.88792*	0.0157575	8.78684e-13				siRNA-ALDH7A1	siRNA-NC	0.004715	0.093963	0.961075
		siRNA-ALDH7A1-2'Ome	-0.0047291	0.0157575	0.770903					siRNA-ALDH7A1-2'Ome	.55943*	0.093963	0.00021435
	siRNA-ALDH7A1-2'Ome	siRNA-NC	-.88320*	0.0157575	9.21832e-13				siRNA-ALDH7A1-2'Ome	siRNA-NC	-.55472*	0.093963	0.000228063
		siRNA-ALDH7A1	0.0047291	0.0157575	0.770903					siRNA-ALDH7A1	-.55943*	0.093963	0.00021435
48h	siRNA-NC	siRNA-ALDH7A1	.90120*	0.043799	7.0681e-09			48h	siRNA-NC	siRNA-ALDH7A1	0.049562	0.0729932	0.514221
		siRNA-ALDH7A1-2'Ome	.92006*	0.043799	5.886e-09					siRNA-ALDH7A1-2'Ome	.59565*	0.0729932	1.88836e-05
	siRNA-ALDH7A1	siRNA-NC	-.90120*	0.043799	7.0681e-09				siRNA-ALDH7A1	siRNA-NC	-0.049562	0.0729932	0.514221
		siRNA-ALDH7A1-2'Ome	0.0188669	0.043799	0.676775					siRNA-ALDH7A1-2'Ome	.54609*	0.0729932	3.76592e-05
	siRNA-ALDH7A1-2'Ome	siRNA-NC	-.92006*	0.043799	5.886e-09				siRNA-ALDH7A1-2'Ome	siRNA-NC	-.59565*	0.0729932	1.88836e-05
		siRNA-ALDH7A1	-0.0188669	0.043799	0.676775					siRNA-ALDH7A1	-.54609*	0.0729932	3.76592e-05
72h	siRNA-NC	siRNA-ALDH7A1	.89461*	0.0182059	3.00249e-12			72h	siRNA-NC	siRNA-ALDH7A1	-0.0399033	0.0521103	0.463436
		siRNA-ALDH7A1-2'Ome	.90250*	0.0182059	2.77498e-12					siRNA-ALDH7A1-2'Ome	.55204*	0.0521103	2.20975e-06
	siRNA-ALDH7A1	siRNA-NC	-.89461*	0.0182059	3.00249e-12				siRNA-ALDH7A1	siRNA-NC	0.0399033	0.0521103	0.463436
		siRNA-ALDH7A1-2'Ome	0.00789355	0.0182059	0.674807					siRNA-ALDH7A1-2'Ome	.59194*	0.0521103	1.22699e-06
	siRNA-ALDH7A1-2'Ome	siRNA-NC	-.90250*	0.0182059	2.77498e-12				siRNA-ALDH7A1-2'Ome	siRNA-NC	-.55204*	0.0521103	2.20975e-06
		siRNA-ALDH7A1	-0.00789355	0.0182059	0.674807					siRNA-ALDH7A1	-.59194*	0.0521103	1.22699e-06
Injection(10μg)								Feeding(10μg)
Time	Group		Difference of means	Standard deviation	P-value			Time	Group		Difference of means	Standard deviation	P-value
8h	siRNA-NC	siRNA-ALDH7A1	0.044917	0.055274	0.4374			8h	siRNA-NC	siRNA-ALDH7A1	-0.005303	0.0590654	0.930427
		siRNA-ALDH7A1-2'Ome	0.0494272	0.055274	0.394487					siRNA-ALDH7A1-2'Ome	0.0155637	0.0590654	0.798099
	siRNA-ALDH7A1	siRNA-NC	-0.044917	0.055274	0.4374				siRNA-ALDH7A1	siRNA-NC	0.005303	0.0590654	0.930427
		siRNA-ALDH7A1-2'Ome	0.00451025	0.055274	0.936752					siRNA-ALDH7A1-2'Ome	0.0208668	0.0590654	0.732011
	siRNA-ALDH7A1-2'Ome	siRNA-NC	-0.0494272	0.055274	0.394487				siRNA-ALDH7A1-2'Ome	siRNA-NC	-0.0155637	0.0590654	0.798099
		siRNA-ALDH7A1	-0.00451025	0.055274	0.936752					siRNA-ALDH7A1	-0.0208668	0.0590654	0.732011
16h	siRNA-NC	siRNA-ALDH7A1	.52211*	0.0403654	4.05512e-07			16h	siRNA-NC	siRNA-ALDH7A1	-0.00215075	0.0443342	0.962368
		siRNA-ALDH7A1-2'Ome	.51443*	0.0403654	4.60443e-07					siRNA-ALDH7A1-2'Ome	.42738*	0.0443342	4.85111e-06
	siRNA-ALDH7A1	siRNA-NC	-.52211*	0.0403654	4.05512e-07				siRNA-ALDH7A1	siRNA-NC	0.00215075	0.0443342	0.962368
		siRNA-ALDH7A1-2'Ome	-0.007677	0.0403654	0.853383					siRNA-ALDH7A1-2'Ome	.42953*	0.0443342	4.65361e-06
	siRNA-ALDH7A1-2'Ome	siRNA-NC	-.51443*	0.0403654	4.60443e-07				siRNA-ALDH7A1-2'Ome	siRNA-NC	-.42738*	0.0443342	4.85111e-06
		siRNA-ALDH7A1	0.007677	0.0403654	0.853383					siRNA-ALDH7A1	-.42953*	0.0443342	4.65361e-06
24h	siRNA-NC	siRNA-ALDH7A1	.91328*	0.0360525	1.11975e-09			24h	siRNA-NC	siRNA-ALDH7A1	0.0229835	0.0773706	0.773165
		siRNA-ALDH7A1-2'Ome	.90992*	0.0360525	1.15704e-09					siRNA-ALDH7A1-2'Ome	.91362*	0.0773706	8.83026e-07
	siRNA-ALDH7A1	siRNA-NC	-.91328*	0.0360525	1.11975e-09				siRNA-ALDH7A1	siRNA-NC	-0.0229835	0.0773706	0.773165
		siRNA-ALDH7A1-2'Ome	-0.00336092	0.0360525	0.927769					siRNA-ALDH7A1-2'Ome	.89064*	0.0773706	1.0963e-06
	siRNA-ALDH7A1-2'Ome	siRNA-NC	-.90992*	0.0360525	1.15704e-09				siRNA-ALDH7A1-2'Ome	siRNA-NC	-.91362*	0.0773706	8.83026e-07
		siRNA-ALDH7A1	0.00336092	0.0360525	0.927769					siRNA-ALDH7A1	-.89064*	0.0773706	1.0963e-06
48h	siRNA-NC	siRNA-ALDH7A1	.91422*	0.0285009	1.36672e-10			48h	siRNA-NC	siRNA-ALDH7A1	0.058556	0.0478119	0.25177
		siRNA-ALDH7A1-2'Ome	.88491*	0.0285009	1.82809e-10					siRNA-ALDH7A1-2'Ome	.92944*	0.0478119	1.16652e-08
	siRNA-ALDH7A1	siRNA-NC	-.91422*	0.0285009	1.36672e-10				siRNA-ALDH7A1	siRNA-NC	-0.058556	0.0478119	0.25177
		siRNA-ALDH7A1-2'Ome	-0.0293077	0.0285009	0.330647					siRNA-ALDH7A1-2'Ome	.87088*	0.0478119	2.06779e-08
	siRNA-ALDH7A1-2'Ome	siRNA-NC	-.88491*	0.0285009	1.82809e-10				siRNA-ALDH7A1-2'Ome	siRNA-NC	-.92944*	0.0478119	1.16652e-08
		siRNA-ALDH7A1	0.0293077	0.0285009	0.330647					siRNA-ALDH7A1	-.87088*	0.0478119	2.06779e-08
72h	siRNA-NC	siRNA-ALDH7A1	.93875*	0.0311302	2.37176e-10			72h	siRNA-NC	siRNA-ALDH7A1	-0.003563	0.070511	0.960803
		siRNA-ALDH7A1-2'Ome	.94082*	0.0311302	2.32547e-10					siRNA-ALDH7A1-2'Ome	.91238*	0.070511	4.04156e-07
	siRNA-ALDH7A1	siRNA-NC	-.93875*	0.0311302	2.37176e-10				siRNA-ALDH7A1	siRNA-NC	0.003563	0.070511	0.960803
		siRNA-ALDH7A1-2'Ome	0.0020765	0.0311302	0.948276					siRNA-ALDH7A1-2'Ome	.91594*	0.070511	3.90858e-07
	siRNA-ALDH7A1-2'Ome	siRNA-NC	-.94082*	0.0311302	2.32547e-10				siRNA-ALDH7A1-2'Ome	siRNA-NC	-.91238*	0.070511	4.04156e-07
		siRNA-ALDH7A1	-0.0020765	0.0311302	0.948276					siRNA-ALDH7A1	-.91594*	0.070511	3.90858e-07
Injection(15μg)								Feeding(15μg)
Time	Group		Difference of means	Standard deviation	P-value			Time	Group		Difference of means	Standard deviation	P-value
8h	siRNA-NC	siRNA-ALDH7A1	-0.00474375	0.0768668	0.952139			8h	siRNA-NC	siRNA-ALDH7A1	0.018916	0.0446904	0.682035
		siRNA-ALDH7A1-2'Ome	0.05164	0.0768668	0.518575					siRNA-ALDH7A1-2'Ome	-0.0016995	0.0446904	0.970495
	siRNA-ALDH7A1	siRNA-NC	0.00474375	0.0768668	0.952139				siRNA-ALDH7A1	siRNA-NC	-0.018916	0.0446904	0.682035
		siRNA-ALDH7A1-2'Ome	0.0563838	0.0768668	0.481907					siRNA-ALDH7A1-2'Ome	-0.0206155	0.0446904	0.655532
	siRNA-ALDH7A1-2'Ome	siRNA-NC	-0.05164	0.0768668	0.518575				siRNA-ALDH7A1-2'Ome	siRNA-NC	0.0016995	0.0446904	0.970495
		siRNA-ALDH7A1	-0.0563838	0.0768668	0.481907					siRNA-ALDH7A1	0.0206155	0.0446904	0.655532
16h	siRNA-NC	siRNA-ALDH7A1	.48061*	0.0390898	6.2591e-07			16h	siRNA-NC	siRNA-ALDH7A1	-0.0601965	0.0366643	0.135042
		siRNA-ALDH7A1-2'Ome	.51077*	0.0390898	3.7161e-07					siRNA-ALDH7A1-2'Ome	.47628*	0.0366643	3.90776e-07
	siRNA-ALDH7A1	siRNA-NC	-.48061*	0.0390898	6.2591e-07				siRNA-ALDH7A1	siRNA-NC	0.0601965	0.0366643	0.135042
		siRNA-ALDH7A1-2'Ome	0.0301627	0.0390898	0.460115					siRNA-ALDH7A1-2'Ome	.53648*	0.0366643	1.39929e-07
	siRNA-ALDH7A1-2'Ome	siRNA-NC	-.51077*	0.0390898	3.7161e-07				siRNA-ALDH7A1-2'Ome	siRNA-NC	-.47628*	0.0366643	3.90776e-07
		siRNA-ALDH7A1	-0.0301627	0.0390898	0.460115					siRNA-ALDH7A1	-.53648*	0.0366643	1.39929e-07
24h	siRNA-NC	siRNA-ALDH7A1	.93845*	0.0158741	5.71235e-13			24h	siRNA-NC	siRNA-ALDH7A1	0.0148975	0.0696272	0.835346
		siRNA-ALDH7A1-2'Ome	.93467*	0.0158741	5.92277e-13					siRNA-ALDH7A1-2'Ome	.91333*	0.0696272	3.59421e-07
	siRNA-ALDH7A1	siRNA-NC	-.93845*	0.0158741	5.71235e-13				siRNA-ALDH7A1	siRNA-NC	-0.0148975	0.0696272	0.835346
		siRNA-ALDH7A1-2'Ome	-0.0037731	0.0158741	0.817445					siRNA-ALDH7A1-2'Ome	.89844*	0.0696272	4.13934e-07
	siRNA-ALDH7A1-2'Ome	siRNA-NC	-.93467*	0.0158741	5.92277e-13				siRNA-ALDH7A1-2'Ome	siRNA-NC	-.91333*	0.0696272	3.59421e-07
		siRNA-ALDH7A1	0.0037731	0.0158741	0.817445					siRNA-ALDH7A1	-.89844*	0.0696272	4.13934e-07
48h	siRNA-NC	siRNA-ALDH7A1	.91635*	0.0433795	5.60248e-09			48h	siRNA-NC	siRNA-ALDH7A1	0.0455518	0.050916	0.394273
		siRNA-ALDH7A1-2'Ome	.92655*	0.0433795	5.08059e-09					siRNA-ALDH7A1-2'Ome	.92918*	0.050916	2.03356e-08
	siRNA-ALDH7A1	siRNA-NC	-.91635*	0.0433795	5.60248e-09				siRNA-ALDH7A1	siRNA-NC	-0.0455518	0.050916	0.394273
		siRNA-ALDH7A1-2'Ome	0.0101923	0.0433795	0.8195					siRNA-ALDH7A1-2'Ome	.88363*	0.050916	3.16074e-08
	siRNA-ALDH7A1-2'Ome	siRNA-NC	-.92655*	0.0433795	5.08059e-09				siRNA-ALDH7A1-2'Ome	siRNA-NC	-.92918*	0.050916	2.03356e-08
		siRNA-ALDH7A1	-0.0101923	0.0433795	0.8195					siRNA-ALDH7A1	-.88363*	0.050916	3.16074e-08
72h	siRNA-NC	siRNA-ALDH7A1	.92955*	0.0287945	1.29104e-10			72h	siRNA-NC	siRNA-ALDH7A1	-0.0128913	0.038585	0.745957
		siRNA-ALDH7A1-2'Ome	.92584*	0.0287945	1.33796e-10					siRNA-ALDH7A1-2'Ome	.90859*	0.038585	2.14151e-09
	siRNA-ALDH7A1	siRNA-NC	-.92955*	0.0287945	1.29104e-10				siRNA-ALDH7A1	siRNA-NC	0.0128913	0.038585	0.745957
		siRNA-ALDH7A1-2'Ome	-0.00370857	0.0287945	0.900352					siRNA-ALDH7A1-2'Ome	.92148*	0.038585	1.88991e-09
	siRNA-ALDH7A1-2'Ome	siRNA-NC	-.92584*	0.0287945	1.33796e-10				siRNA-ALDH7A1-2'Ome	siRNA-NC	-.90859*	0.038585	2.14151e-09
		siRNA-ALDH7A1	0.00370857	0.0287945	0.900352					siRNA-ALDH7A1	-.92148*	0.038585	1.88991e-09
