# Supplementary material for: A Comparison of RNA Interference via Injection and Feeding in Honey Bees
Source: Insects. 2022 Oct 13;13(10):928. doi: 10.3390/insects13100928 (PMC9604379; doi:10.3390/insects13100928)
Supplement: Supplementary file 1 [file insects-13-00928-s001.zip › Table S3.xlsx]

## Sheet: Sheet1
Injection(0.5μg)								Feeding(0.5μg)
Time	Group		Difference of means	Standard deviation	P-value			Time	Group		Difference of means	Standard deviation	P-value
8h	siRNA-NC	siRNA-ALDH7A1	0.0681265	0.0670528	0.336157			8h	siRNA-NC	siRNA-ALDH7A1	-0.013734	0.053852	0.80443
		siRNA-ALDH7A1-2'Ome	-0.00036025	0.0670528	0.99583					siRNA-ALDH7A1-2'Ome	0.0240178	0.053852	0.666137
	siRNA-ALDH7A1	siRNA-NC	-0.0681265	0.0670528	0.336157				siRNA-ALDH7A1	siRNA-NC	0.013734	0.053852	0.80443
		siRNA-ALDH7A1-2'Ome	-0.0684868	0.0670528	0.333741					siRNA-ALDH7A1-2'Ome	0.0377517	0.053852	0.501007
	siRNA-ALDH7A1-2'Ome	siRNA-NC	0.00036025	0.0670528	0.99583				siRNA-ALDH7A1-2'Ome	siRNA-NC	-0.0240178	0.053852	0.666137
		siRNA-ALDH7A1	0.0684868	0.0670528	0.333741					siRNA-ALDH7A1	-0.0377517	0.053852	0.501007
16h	siRNA-NC	siRNA-ALDH7A1	0.0627505	0.0626979	0.343052			16h	siRNA-NC	siRNA-ALDH7A1	0.002724	0.0489528	0.95684
		siRNA-ALDH7A1-2'Ome	0.0401805	0.0626979	0.537589					siRNA-ALDH7A1-2'Ome	-0.0153023	0.0489528	0.761712
	siRNA-ALDH7A1	siRNA-NC	-0.0627505	0.0626979	0.343052				siRNA-ALDH7A1	siRNA-NC	-0.002724	0.0489528	0.95684
		siRNA-ALDH7A1-2'Ome	-0.02257	0.0626979	0.727165					siRNA-ALDH7A1-2'Ome	-0.0180263	0.0489528	0.721208
	siRNA-ALDH7A1-2'Ome	siRNA-NC	-0.0401805	0.0626979	0.537589				siRNA-ALDH7A1-2'Ome	siRNA-NC	0.0153023	0.0489528	0.761712
		siRNA-ALDH7A1	0.02257	0.0626979	0.727165					siRNA-ALDH7A1	0.0180263	0.0489528	0.721208
24h	siRNA-NC	siRNA-ALDH7A1	0.0477895	0.067308	0.49568			24h	siRNA-NC	siRNA-ALDH7A1	0.0548163	0.0503082	0.304199
		siRNA-ALDH7A1-2'Ome	0.0383592	0.067308	0.582685					siRNA-ALDH7A1-2'Ome	-0.0485747	0.0503082	0.3595
	siRNA-ALDH7A1	siRNA-NC	-0.0477895	0.067308	0.49568				siRNA-ALDH7A1	siRNA-NC	-0.0548163	0.0503082	0.304199
		siRNA-ALDH7A1-2'Ome	-0.00943025	0.067308	0.891662					siRNA-ALDH7A1-2'Ome	-0.103391	0.0503082	0.0700277
	siRNA-ALDH7A1-2'Ome	siRNA-NC	-0.0383592	0.067308	0.582685				siRNA-ALDH7A1-2'Ome	siRNA-NC	0.0485747	0.0503082	0.3595
		siRNA-ALDH7A1	0.00943025	0.067308	0.891662					siRNA-ALDH7A1	0.103391	0.0503082	0.0700277
48h	siRNA-NC	siRNA-ALDH7A1	-0.00716225	0.0985233	0.943638			48h	siRNA-NC	siRNA-ALDH7A1	0.018286	0.052207	0.734202
		siRNA-ALDH7A1-2'Ome	0.0004365	0.0985233	0.996562					siRNA-ALDH7A1-2'Ome	0.0445202	0.052207	0.415907
	siRNA-ALDH7A1	siRNA-NC	0.00716225	0.0985233	0.943638				siRNA-ALDH7A1	siRNA-NC	-0.018286	0.052207	0.734202
		siRNA-ALDH7A1-2'Ome	0.00759875	0.0985233	0.94021					siRNA-ALDH7A1-2'Ome	0.0262342	0.052207	0.627378
	siRNA-ALDH7A1-2'Ome	siRNA-NC	-0.0004365	0.0985233	0.996562				siRNA-ALDH7A1-2'Ome	siRNA-NC	-0.0445202	0.052207	0.415907
		siRNA-ALDH7A1	-0.00759875	0.0985233	0.94021					siRNA-ALDH7A1	-0.0262342	0.052207	0.627378
72h	siRNA-NC	siRNA-ALDH7A1	0.0392998	0.0706851	0.591774			72h	siRNA-NC	siRNA-ALDH7A1	0.0631247	0.0393671	0.14329
		siRNA-ALDH7A1-2'Ome	0.0361265	0.0706851	0.621589					siRNA-ALDH7A1-2'Ome	0.0124747	0.0393671	0.75856
	siRNA-ALDH7A1	siRNA-NC	-0.0392998	0.0706851	0.591774				siRNA-ALDH7A1	siRNA-NC	-0.0631247	0.0393671	0.14329
		siRNA-ALDH7A1-2'Ome	-0.00317325	0.0706851	0.965173					siRNA-ALDH7A1-2'Ome	-0.05065	0.0393671	0.230338
	siRNA-ALDH7A1-2'Ome	siRNA-NC	-0.0361265	0.0706851	0.621589				siRNA-ALDH7A1-2'Ome	siRNA-NC	-0.0124747	0.0393671	0.75856
		siRNA-ALDH7A1	0.00317325	0.0706851	0.965173					siRNA-ALDH7A1	0.05065	0.0393671	0.230338
Injection(1μg)								Feeding(1μg)
Time	Group		Difference of means	Standard deviation	P-value			Time	Group		Difference of means	Standard deviation	P-value
8h	siRNA-NC	siRNA-ALDH7A1	0.00018875	0.0836354	0.998249			8h	siRNA-NC	siRNA-ALDH7A1	-0.0537932	0.0397286	0.208749
		siRNA-ALDH7A1-2'Ome	0.00230175	0.0836354	0.978645					siRNA-ALDH7A1-2'Ome	-0.027518	0.0397286	0.506007
	siRNA-ALDH7A1	siRNA-NC	-0.00018875	0.0836354	0.998249				siRNA-ALDH7A1	siRNA-NC	0.0537932	0.0397286	0.208749
		siRNA-ALDH7A1-2'Ome	0.002113	0.0836354	0.980395					siRNA-ALDH7A1-2'Ome	0.0262752	0.0397286	0.524944
	siRNA-ALDH7A1-2'Ome	siRNA-NC	-0.00230175	0.0836354	0.978645				siRNA-ALDH7A1-2'Ome	siRNA-NC	0.027518	0.0397286	0.506007
		siRNA-ALDH7A1	-0.002113	0.0836354	0.980395					siRNA-ALDH7A1	-0.0262752	0.0397286	0.524944
16h	siRNA-NC	siRNA-ALDH7A1	.22582*	0.0375268	0.000198203			16h	siRNA-NC	siRNA-ALDH7A1	0.002635	0.0542994	0.962356
		siRNA-ALDH7A1-2'Ome	.21530*	0.0375268	0.000280791					siRNA-ALDH7A1-2'Ome	0.0224602	0.0542994	0.688823
	siRNA-ALDH7A1	siRNA-NC	-.22582*	0.0375268	0.000198203				siRNA-ALDH7A1	siRNA-NC	-0.002635	0.0542994	0.962356
		siRNA-ALDH7A1-2'Ome	-0.010519	0.0375268	0.785579					siRNA-ALDH7A1-2'Ome	0.0198253	0.0542994	0.723462
	siRNA-ALDH7A1-2'Ome	siRNA-NC	-.21530*	0.0375268	0.000280791				siRNA-ALDH7A1-2'Ome	siRNA-NC	-0.0224602	0.0542994	0.688823
		siRNA-ALDH7A1	0.010519	0.0375268	0.785579					siRNA-ALDH7A1	-0.0198253	0.0542994	0.723462
24h	siRNA-NC	siRNA-ALDH7A1	.43719*	0.04662	6.09255e-06			24h	siRNA-NC	siRNA-ALDH7A1	-0.034597	0.0426318	0.437996
		siRNA-ALDH7A1-2'Ome	.46690*	0.04662	3.5341e-06					siRNA-ALDH7A1-2'Ome	-0.0648845	0.0426318	0.162344
	siRNA-ALDH7A1	siRNA-NC	-.43719*	0.04662	6.09255e-06				siRNA-ALDH7A1	siRNA-NC	0.034597	0.0426318	0.437996
		siRNA-ALDH7A1-2'Ome	0.0297104	0.04662	0.539808					siRNA-ALDH7A1-2'Ome	-0.0302875	0.0426318	0.495425
	siRNA-ALDH7A1-2'Ome	siRNA-NC	-.46690*	0.04662	3.5341e-06				siRNA-ALDH7A1-2'Ome	siRNA-NC	0.0648845	0.0426318	0.162344
		siRNA-ALDH7A1	-0.0297104	0.04662	0.539808					siRNA-ALDH7A1	0.0302875	0.0426318	0.495425
48h	siRNA-NC	siRNA-ALDH7A1	.61121*	0.0593551	2.80202e-06			48h	siRNA-NC	siRNA-ALDH7A1	0.0192052	0.0419481	0.657925
		siRNA-ALDH7A1-2'Ome	.59359*	0.0593551	3.57646e-06					siRNA-ALDH7A1-2'Ome	0.0836255	0.0419481	0.0773534
	siRNA-ALDH7A1	siRNA-NC	-.61121*	0.0593551	2.80202e-06				siRNA-ALDH7A1	siRNA-NC	-0.0192052	0.0419481	0.657925
		siRNA-ALDH7A1-2'Ome	-0.017622	0.0593551	0.773288					siRNA-ALDH7A1-2'Ome	0.0644203	0.0419481	0.158983
	siRNA-ALDH7A1-2'Ome	siRNA-NC	-.59359*	0.0593551	3.57646e-06				siRNA-ALDH7A1-2'Ome	siRNA-NC	-0.0836255	0.0419481	0.0773534
		siRNA-ALDH7A1	0.017622	0.0593551	0.773288					siRNA-ALDH7A1	-0.0644203	0.0419481	0.158983
72h	siRNA-NC	siRNA-ALDH7A1	.58567*	0.0485191	7.32257e-07			72h	siRNA-NC	siRNA-ALDH7A1	0.066226	0.0622884	0.315378
		siRNA-ALDH7A1-2'Ome	.58729*	0.0485191	7.15228e-07					siRNA-ALDH7A1-2'Ome	-0.0137725	0.0622884	0.829943
	siRNA-ALDH7A1	siRNA-NC	-.58567*	0.0485191	7.32257e-07				siRNA-ALDH7A1	siRNA-NC	-0.066226	0.0622884	0.315378
		siRNA-ALDH7A1-2'Ome	0.0016188	0.0485191	0.974112					siRNA-ALDH7A1-2'Ome	-0.0799985	0.0622884	0.231101
	siRNA-ALDH7A1-2'Ome	siRNA-NC	-.58729*	0.0485191	7.15228e-07				siRNA-ALDH7A1-2'Ome	siRNA-NC	0.0137725	0.0622884	0.829943
		siRNA-ALDH7A1	-0.0016188	0.0485191	0.974112					siRNA-ALDH7A1	0.0799985	0.0622884	0.231101
Injection(2μg)								Feeding(2μg)
Time	Group		Difference of means	Standard deviation	P-value			Time	Group		Difference of means	Standard deviation	P-value
8h	siRNA-NC	siRNA-ALDH7A1	0.0563082	0.0889639	0.542522			8h	siRNA-NC	siRNA-ALDH7A1	0.0450172	0.0537924	0.424329
		siRNA-ALDH7A1-2'Ome	-0.035183	0.0889639	0.701703					siRNA-ALDH7A1-2'Ome	0.118595	0.0537924	0.0549195
	siRNA-ALDH7A1	siRNA-NC	-0.0563082	0.0889639	0.542522				siRNA-ALDH7A1	siRNA-NC	-0.0450172	0.0537924	0.424329
		siRNA-ALDH7A1-2'Ome	-0.0914912	0.0889639	0.330602					siRNA-ALDH7A1-2'Ome	0.073578	0.0537924	0.204549
	siRNA-ALDH7A1-2'Ome	siRNA-NC	0.035183	0.0889639	0.701703				siRNA-ALDH7A1-2'Ome	siRNA-NC	-0.118595	0.0537924	0.0549195
		siRNA-ALDH7A1	0.0914912	0.0889639	0.330602					siRNA-ALDH7A1	-0.073578	0.0537924	0.204549
16h	siRNA-NC	siRNA-ALDH7A1	.37283*	0.0622461	0.000205098			16h	siRNA-NC	siRNA-ALDH7A1	0.0322465	0.04673	0.507559
		siRNA-ALDH7A1-2'Ome	.30238*	0.0622461	0.000898453					siRNA-ALDH7A1-2'Ome	0.0118825	0.04673	0.804994
	siRNA-ALDH7A1	siRNA-NC	-.37283*	0.0622461	0.000205098				siRNA-ALDH7A1	siRNA-NC	-0.0322465	0.04673	0.507559
		siRNA-ALDH7A1-2'Ome	-0.0704448	0.0622461	0.287006					siRNA-ALDH7A1-2'Ome	-0.020364	0.04673	0.673262
	siRNA-ALDH7A1-2'Ome	siRNA-NC	-.30238*	0.0622461	0.000898453				siRNA-ALDH7A1-2'Ome	siRNA-NC	-0.0118825	0.04673	0.804994
		siRNA-ALDH7A1	0.0704448	0.0622461	0.287006					siRNA-ALDH7A1	0.020364	0.04673	0.673262
24h	siRNA-NC	siRNA-ALDH7A1	.68145*	0.0548387	5.71542e-07			24h	siRNA-NC	siRNA-ALDH7A1	0.0715425	0.0474264	0.165703
		siRNA-ALDH7A1-2'Ome	.68451*	0.0548387	5.50101e-07					siRNA-ALDH7A1-2'Ome	0.00145675	0.0474264	0.976166
	siRNA-ALDH7A1	siRNA-NC	-.68145*	0.0548387	5.71542e-07				siRNA-ALDH7A1	siRNA-NC	-0.0715425	0.0474264	0.165703
		siRNA-ALDH7A1-2'Ome	0.00305398	0.0548387	0.956805					siRNA-ALDH7A1-2'Ome	-0.0700857	0.0474264	0.173586
	siRNA-ALDH7A1-2'Ome	siRNA-NC	-.68451*	0.0548387	5.50101e-07				siRNA-ALDH7A1-2'Ome	siRNA-NC	-0.00145675	0.0474264	0.976166
		siRNA-ALDH7A1	-0.00305398	0.0548387	0.956805					siRNA-ALDH7A1	0.0700857	0.0474264	0.173586
48h	siRNA-NC	siRNA-ALDH7A1	.68323*	0.0555207	6.21207e-07			48h	siRNA-NC	siRNA-ALDH7A1	0.0368365	0.0525508	0.501042
		siRNA-ALDH7A1-2'Ome	.69875*	0.0555207	5.12671e-07					siRNA-ALDH7A1-2'Ome	0.0245005	0.0525508	0.652133
	siRNA-ALDH7A1	siRNA-NC	-.68323*	0.0555207	6.21207e-07				siRNA-ALDH7A1	siRNA-NC	-0.0368365	0.0525508	0.501042
		siRNA-ALDH7A1-2'Ome	0.0155183	0.0555207	0.786175					siRNA-ALDH7A1-2'Ome	-0.012336	0.0525508	0.819661
	siRNA-ALDH7A1-2'Ome	siRNA-NC	-.69875*	0.0555207	5.12671e-07				siRNA-ALDH7A1-2'Ome	siRNA-NC	-0.0245005	0.0525508	0.652133
		siRNA-ALDH7A1	-0.0155183	0.0555207	0.786175					siRNA-ALDH7A1	0.012336	0.0525508	0.819661
72h	siRNA-NC	siRNA-ALDH7A1	.71415*	0.0525314	2.64246e-07			72h	siRNA-NC	siRNA-ALDH7A1	-0.0442042	0.0758508	0.574351
		siRNA-ALDH7A1-2'Ome	.72661*	0.0525314	2.27626e-07					siRNA-ALDH7A1-2'Ome	-0.0412065	0.0758508	0.600147
	siRNA-ALDH7A1	siRNA-NC	-.71415*	0.0525314	2.64246e-07				siRNA-ALDH7A1	siRNA-NC	0.0442042	0.0758508	0.574351
		siRNA-ALDH7A1-2'Ome	0.0124581	0.0525314	0.817847					siRNA-ALDH7A1-2'Ome	0.00299775	0.0758508	0.969337
	siRNA-ALDH7A1-2'Ome	siRNA-NC	-.72661*	0.0525314	2.27626e-07				siRNA-ALDH7A1-2'Ome	siRNA-NC	0.0412065	0.0758508	0.600147
		siRNA-ALDH7A1	-0.0124581	0.0525314	0.817847					siRNA-ALDH7A1	-0.00299775	0.0758508	0.969337
Injection(5μg)								Feeding(5μg)
Time	Group		Difference of means	Standard deviation	P-value			Time	Group		Difference of means	Standard deviation	P-value
8h	siRNA-NC	siRNA-ALDH7A1	-0.0346213	0.0789471	0.671335			8h	siRNA-NC	siRNA-ALDH7A1	-0.0725537	0.050546	0.185
		siRNA-ALDH7A1-2'Ome	0.00142725	0.0789471	0.985971					siRNA-ALDH7A1-2'Ome	-0.0268647	0.050546	0.607944
	siRNA-ALDH7A1	siRNA-NC	0.0346213	0.0789471	0.671335				siRNA-ALDH7A1	siRNA-NC	0.0725537	0.050546	0.185
		siRNA-ALDH7A1-2'Ome	0.0360485	0.0789471	0.658767					siRNA-ALDH7A1-2'Ome	0.045689	0.050546	0.389597
	siRNA-ALDH7A1-2'Ome	siRNA-NC	-0.00142725	0.0789471	0.985971				siRNA-ALDH7A1-2'Ome	siRNA-NC	0.0268647	0.050546	0.607944
		siRNA-ALDH7A1	-0.0360485	0.0789471	0.658767					siRNA-ALDH7A1	-0.045689	0.050546	0.389597
16h	siRNA-NC	siRNA-ALDH7A1	.38006*	0.0444202	1.28898e-05			16h	siRNA-NC	siRNA-ALDH7A1	-0.0291433	0.0839674	0.73651
		siRNA-ALDH7A1-2'Ome	.28166*	0.0444202	0.000134334					siRNA-ALDH7A1-2'Ome	.19900*	0.0839674	0.0419113
	siRNA-ALDH7A1	siRNA-NC	-.38006*	0.0444202	1.28898e-05				siRNA-ALDH7A1	siRNA-NC	0.0291433	0.0839674	0.73651
		siRNA-ALDH7A1-2'Ome	-0.0984023	0.0444202	0.0539799					siRNA-ALDH7A1-2'Ome	.22814*	0.0839674	0.0237223
	siRNA-ALDH7A1-2'Ome	siRNA-NC	-.28166*	0.0444202	0.000134334				siRNA-ALDH7A1-2'Ome	siRNA-NC	-.19900*	0.0839674	0.0419113
		siRNA-ALDH7A1	0.0984023	0.0444202	0.0539799					siRNA-ALDH7A1	-.22814*	0.0839674	0.0237223
24h	siRNA-NC	siRNA-ALDH7A1	.66632*	0.0369973	2.2835e-08			24h	siRNA-NC	siRNA-ALDH7A1	0.0132372	0.0967014	0.894133
		siRNA-ALDH7A1-2'Ome	.64714*	0.0369973	2.95047e-08					siRNA-ALDH7A1-2'Ome	.34776*	0.0967014	0.00578269
	siRNA-ALDH7A1	siRNA-NC	-.66632*	0.0369973	2.2835e-08				siRNA-ALDH7A1	siRNA-NC	-0.0132372	0.0967014	0.894133
		siRNA-ALDH7A1-2'Ome	-0.0191825	0.0369973	0.616627					siRNA-ALDH7A1-2'Ome	.33452*	0.0967014	0.0071688
	siRNA-ALDH7A1-2'Ome	siRNA-NC	-.64714*	0.0369973	2.95047e-08				siRNA-ALDH7A1-2'Ome	siRNA-NC	-.34776*	0.0967014	0.00578269
		siRNA-ALDH7A1	0.0191825	0.0369973	0.616627					siRNA-ALDH7A1	-.33452*	0.0967014	0.0071688
48h	siRNA-NC	siRNA-ALDH7A1	.68880*	0.0556211	5.88592e-07			48h	siRNA-NC	siRNA-ALDH7A1	-0.045837	0.0771617	0.567116
		siRNA-ALDH7A1-2'Ome	.68533*	0.0556211	6.14528e-07					siRNA-ALDH7A1-2'Ome	.33467*	0.0771617	0.00188499
	siRNA-ALDH7A1	siRNA-NC	-.68880*	0.0556211	5.88592e-07				siRNA-ALDH7A1	siRNA-NC	0.045837	0.0771617	0.567116
		siRNA-ALDH7A1-2'Ome	-0.00346765	0.0556211	0.951651					siRNA-ALDH7A1-2'Ome	.38051*	0.0771617	0.000811887
	siRNA-ALDH7A1-2'Ome	siRNA-NC	-.68533*	0.0556211	6.14528e-07				siRNA-ALDH7A1-2'Ome	siRNA-NC	-.33467*	0.0771617	0.00188499
		siRNA-ALDH7A1	0.00346765	0.0556211	0.951651					siRNA-ALDH7A1	-.38051*	0.0771617	0.000811887
72h	siRNA-NC	siRNA-ALDH7A1	.69477*	0.0302826	2.69709e-09			72h	siRNA-NC	siRNA-ALDH7A1	0.00359625	0.0588747	0.952628
		siRNA-ALDH7A1-2'Ome	.63744*	0.0302826	5.77953e-09					siRNA-ALDH7A1-2'Ome	.33743*	0.0588747	0.000282859
	siRNA-ALDH7A1	siRNA-NC	-.69477*	0.0302826	2.69709e-09				siRNA-ALDH7A1	siRNA-NC	-0.00359625	0.0588747	0.952628
		siRNA-ALDH7A1-2'Ome	-0.0573281	0.0302826	0.090884					siRNA-ALDH7A1-2'Ome	.33384*	0.0588747	0.000305607
	siRNA-ALDH7A1-2'Ome	siRNA-NC	-.63744*	0.0302826	5.77953e-09				siRNA-ALDH7A1-2'Ome	siRNA-NC	-.33743*	0.0588747	0.000282859
		siRNA-ALDH7A1	0.0573281	0.0302826	0.090884					siRNA-ALDH7A1	-.33384*	0.0588747	0.000305607
Injection(10μg)								Feeding(10μg)
Time	Group		Difference of means	Standard deviation	P-value			Time	Group		Difference of means	Standard deviation	P-value
8h	siRNA-NC	siRNA-ALDH7A1	0.0056755	0.0490913	0.910499			8h	siRNA-NC	siRNA-ALDH7A1	0.040034	0.0639713	0.546978
		siRNA-ALDH7A1-2'Ome	-0.0321027	0.0490913	0.529503					siRNA-ALDH7A1-2'Ome	-0.0204565	0.0639713	0.756436
	siRNA-ALDH7A1	siRNA-NC	-0.0056755	0.0490913	0.910499				siRNA-ALDH7A1	siRNA-NC	-0.040034	0.0639713	0.546978
		siRNA-ALDH7A1-2'Ome	-0.0377782	0.0490913	0.461285					siRNA-ALDH7A1-2'Ome	-0.0604905	0.0639713	0.369052
	siRNA-ALDH7A1-2'Ome	siRNA-NC	0.0321027	0.0490913	0.529503				siRNA-ALDH7A1-2'Ome	siRNA-NC	0.0204565	0.0639713	0.756436
		siRNA-ALDH7A1	0.0377782	0.0490913	0.461285					siRNA-ALDH7A1	0.0604905	0.0639713	0.369052
16h	siRNA-NC	siRNA-ALDH7A1	.35322*	0.0424285	1.60796e-05			16h	siRNA-NC	siRNA-ALDH7A1	0.0996695	0.0468431	0.0622506
		siRNA-ALDH7A1-2'Ome	.35140*	0.0424285	1.67641e-05					siRNA-ALDH7A1-2'Ome	.36859*	0.0468431	2.526e-05
	siRNA-ALDH7A1	siRNA-NC	-.35322*	0.0424285	1.60796e-05				siRNA-ALDH7A1	siRNA-NC	-0.0996695	0.0468431	0.0622506
		siRNA-ALDH7A1-2'Ome	-0.0018237	0.0424285	0.966654					siRNA-ALDH7A1-2'Ome	.26892*	0.0468431	0.000279495
	siRNA-ALDH7A1-2'Ome	siRNA-NC	-.35140*	0.0424285	1.67641e-05				siRNA-ALDH7A1-2'Ome	siRNA-NC	-.36859*	0.0468431	2.526e-05
		siRNA-ALDH7A1	0.0018237	0.0424285	0.966654					siRNA-ALDH7A1	-.26892*	0.0468431	0.000279495
24h	siRNA-NC	siRNA-ALDH7A1	.70385*	0.0390388	2.26185e-08			24h	siRNA-NC	siRNA-ALDH7A1	0.0124658	0.0880461	0.890529
		siRNA-ALDH7A1-2'Ome	.66164*	0.0390388	3.88974e-08					siRNA-ALDH7A1-2'Ome	.64892*	0.0880461	4.2353e-05
	siRNA-ALDH7A1	siRNA-NC	-.70385*	0.0390388	2.26185e-08				siRNA-ALDH7A1	siRNA-NC	-0.0124658	0.0880461	0.890529
		siRNA-ALDH7A1-2'Ome	-0.0422146	0.0390388	0.307664					siRNA-ALDH7A1-2'Ome	.63645*	0.0880461	4.92853e-05
	siRNA-ALDH7A1-2'Ome	siRNA-NC	-.66164*	0.0390388	3.88974e-08				siRNA-ALDH7A1-2'Ome	siRNA-NC	-.64892*	0.0880461	4.2353e-05
		siRNA-ALDH7A1	0.0422146	0.0390388	0.307664					siRNA-ALDH7A1	-.63645*	0.0880461	4.92853e-05
48h	siRNA-NC	siRNA-ALDH7A1	.69149*	0.0330798	6.14636e-09			48h	siRNA-NC	siRNA-ALDH7A1	0.0409215	0.0585288	0.502114
		siRNA-ALDH7A1-2'Ome	.68691*	0.0330798	6.51858e-09					siRNA-ALDH7A1-2'Ome	.63208*	0.0585288	1.87968e-06
	siRNA-ALDH7A1	siRNA-NC	-.69149*	0.0330798	6.14636e-09				siRNA-ALDH7A1	siRNA-NC	-0.0409215	0.0585288	0.502114
		siRNA-ALDH7A1-2'Ome	-0.00458718	0.0330798	0.892764					siRNA-ALDH7A1-2'Ome	.59116*	0.0585288	3.29259e-06
	siRNA-ALDH7A1-2'Ome	siRNA-NC	-.68691*	0.0330798	6.51858e-09				siRNA-ALDH7A1-2'Ome	siRNA-NC	-.63208*	0.0585288	1.87968e-06
		siRNA-ALDH7A1	0.00458718	0.0330798	0.892764					siRNA-ALDH7A1	-.59116*	0.0585288	3.29259e-06
72h	siRNA-NC	siRNA-ALDH7A1	.68650*	0.0440619	8.1092e-08			72h	siRNA-NC	siRNA-ALDH7A1	0.0412918	0.0657267	0.54546
		siRNA-ALDH7A1-2'Ome	.71654*	0.0440619	5.58224e-08					siRNA-ALDH7A1-2'Ome	.65177*	0.0657267	3.83718e-06
	siRNA-ALDH7A1	siRNA-NC	-.68650*	0.0440619	8.1092e-08				siRNA-ALDH7A1	siRNA-NC	-0.0412918	0.0657267	0.54546
		siRNA-ALDH7A1-2'Ome	0.0300391	0.0440619	0.512559					siRNA-ALDH7A1-2'Ome	.61048*	0.0657267	6.59309e-06
	siRNA-ALDH7A1-2'Ome	siRNA-NC	-.71654*	0.0440619	5.58224e-08				siRNA-ALDH7A1-2'Ome	siRNA-NC	-.65177*	0.0657267	3.83718e-06
		siRNA-ALDH7A1	-0.0300391	0.0440619	0.512559					siRNA-ALDH7A1	-.61048*	0.0657267	6.59309e-06
Injection(15μg)								Feeding(15μg)
Time	Group		Difference of means	Standard deviation	P-value			Time	Group		Difference of means	Standard deviation	P-value
8h	siRNA-NC	siRNA-ALDH7A1	0.0187635	0.0725533	0.801748			8h	siRNA-NC	siRNA-ALDH7A1	0.0308855	0.0463359	0.521774
		siRNA-ALDH7A1-2'Ome	0.0473737	0.0725533	0.530112					siRNA-ALDH7A1-2'Ome	-0.00956725	0.0463359	0.841015
	siRNA-ALDH7A1	siRNA-NC	-0.0187635	0.0725533	0.801748				siRNA-ALDH7A1	siRNA-NC	-0.0308855	0.0463359	0.521774
		siRNA-ALDH7A1-2'Ome	0.0286102	0.0725533	0.702515					siRNA-ALDH7A1-2'Ome	-0.0404528	0.0463359	0.405336
	siRNA-ALDH7A1-2'Ome	siRNA-NC	-0.0473737	0.0725533	0.530112				siRNA-ALDH7A1-2'Ome	siRNA-NC	0.00956725	0.0463359	0.841015
		siRNA-ALDH7A1	-0.0286102	0.0725533	0.702515					siRNA-ALDH7A1	0.0404528	0.0463359	0.405336
16h	siRNA-NC	siRNA-ALDH7A1	.35155*	0.0479959	4.4463e-05			16h	siRNA-NC	siRNA-ALDH7A1	0.0182033	0.0520251	0.734467
		siRNA-ALDH7A1-2'Ome	.33812*	0.0479959	6.02023e-05					siRNA-ALDH7A1-2'Ome	.30097*	0.0520251	0.000264385
	siRNA-ALDH7A1	siRNA-NC	-.35155*	0.0479959	4.4463e-05				siRNA-ALDH7A1	siRNA-NC	-0.0182033	0.0520251	0.734467
		siRNA-ALDH7A1-2'Ome	-0.0134274	0.0479959	0.785984					siRNA-ALDH7A1-2'Ome	.28276*	0.0520251	0.000413583
	siRNA-ALDH7A1-2'Ome	siRNA-NC	-.33812*	0.0479959	6.02023e-05				siRNA-ALDH7A1-2'Ome	siRNA-NC	-.30097*	0.0520251	0.000264385
		siRNA-ALDH7A1	0.0134274	0.0479959	0.785984					siRNA-ALDH7A1	-.28276*	0.0520251	0.000413583
24h	siRNA-NC	siRNA-ALDH7A1	.68537*	0.0252386	6.03395e-10			24h	siRNA-NC	siRNA-ALDH7A1	0.0658477	0.0696722	0.369284
		siRNA-ALDH7A1-2'Ome	.67362*	0.0252386	7.03761e-10					siRNA-ALDH7A1-2'Ome	.65246*	0.0696722	6.16195e-06
	siRNA-ALDH7A1	siRNA-NC	-.68537*	0.0252386	6.03395e-10				siRNA-ALDH7A1	siRNA-NC	-0.0658477	0.0696722	0.369284
		siRNA-ALDH7A1-2'Ome	-0.0117475	0.0252386	0.65266					siRNA-ALDH7A1-2'Ome	.58661*	0.0696722	1.46791e-05
	siRNA-ALDH7A1-2'Ome	siRNA-NC	-.67362*	0.0252386	7.03761e-10				siRNA-ALDH7A1-2'Ome	siRNA-NC	-.65246*	0.0696722	6.16195e-06
		siRNA-ALDH7A1	0.0117475	0.0252386	0.65266					siRNA-ALDH7A1	-.58661*	0.0696722	1.46791e-05
48h	siRNA-NC	siRNA-ALDH7A1	.67731*	0.05385	5.1536e-07			48h	siRNA-NC	siRNA-ALDH7A1	-0.015946	0.0619179	0.802558
		siRNA-ALDH7A1-2'Ome	.68742*	0.05385	4.53954e-07					siRNA-ALDH7A1-2'Ome	.61868*	0.0619179	3.60242e-06
	siRNA-ALDH7A1	siRNA-NC	-.67731*	0.05385	5.1536e-07				siRNA-ALDH7A1	siRNA-NC	0.015946	0.0619179	0.802558
		siRNA-ALDH7A1-2'Ome	0.0101068	0.05385	0.855287					siRNA-ALDH7A1-2'Ome	.63462*	0.0619179	2.91368e-06
	siRNA-ALDH7A1-2'Ome	siRNA-NC	-.68742*	0.05385	4.53954e-07				siRNA-ALDH7A1-2'Ome	siRNA-NC	-.61868*	0.0619179	3.60242e-06
		siRNA-ALDH7A1	-0.0101068	0.05385	0.855287					siRNA-ALDH7A1	-.63462*	0.0619179	2.91368e-06
72h	siRNA-NC	siRNA-ALDH7A1	.70322*	0.0348332	8.35909e-09			72h	siRNA-NC	siRNA-ALDH7A1	-0.0487667	0.0337069	0.181871
		siRNA-ALDH7A1-2'Ome	.71948*	0.0348332	6.83156e-09					siRNA-ALDH7A1-2'Ome	.62691*	0.0337069	1.72137e-08
	siRNA-ALDH7A1	siRNA-NC	-.70322*	0.0348332	8.35909e-09				siRNA-ALDH7A1	siRNA-NC	0.0487667	0.0337069	0.181871
		siRNA-ALDH7A1-2'Ome	0.0162615	0.0348332	0.651709					siRNA-ALDH7A1-2'Ome	.67567*	0.0337069	8.89922e-09
	siRNA-ALDH7A1-2'Ome	siRNA-NC	-.71948*	0.0348332	6.83156e-09				siRNA-ALDH7A1-2'Ome	siRNA-NC	-.62691*	0.0337069	1.72137e-08
		siRNA-ALDH7A1	-0.0162615	0.0348332	0.651709					siRNA-ALDH7A1	-.67567*	0.0337069	8.89922e-09
