# Supplementary material for: A Comparison of RNA Interference via Injection and Feeding in Honey Bees
Source: Insects. 2022 Oct 13;13(10):928. doi: 10.3390/insects13100928 (PMC9604379; doi:10.3390/insects13100928)
Supplement: Supplementary file 1 [file insects-13-00928-s001.zip › Table S4.xlsx]

## Sheet: Sheet1
Injection(0.5μg)								Feeding(0.5μg)
Time	Group		Difference of means	Standard deviation	P-value			Time	Group		Difference of means	Standard deviation	P-value
8h	siRNA-NC	siRNA-ALDH7A1	-0.047539	0.073744	0.535238			8h	siRNA-NC	siRNA-ALDH7A1	0.0554293	0.0641879	0.410259
		siRNA-ALDH7A1-2'Ome	-0.0679143	0.073744	0.381102					siRNA-ALDH7A1-2'Ome	0.0337795	0.0641879	0.611429
	siRNA-ALDH7A1	siRNA-NC	0.047539	0.073744	0.535238				siRNA-ALDH7A1	siRNA-NC	-0.0554293	0.0641879	0.410259
		siRNA-ALDH7A1-2'Ome	-0.0203753	0.073744	0.78856					siRNA-ALDH7A1-2'Ome	-0.0216498	0.0641879	0.743633
	siRNA-ALDH7A1-2'Ome	siRNA-NC	0.0679143	0.073744	0.381102				siRNA-ALDH7A1-2'Ome	siRNA-NC	-0.0337795	0.0641879	0.611429
		siRNA-ALDH7A1	0.0203753	0.073744	0.78856					siRNA-ALDH7A1	0.0216498	0.0641879	0.743633
16h	siRNA-NC	siRNA-ALDH7A1	-0.0022045	0.056616	0.96979			16h	siRNA-NC	siRNA-ALDH7A1	0.061928	0.0637572	0.356773
		siRNA-ALDH7A1-2'Ome	0.0565727	0.056616	0.343786					siRNA-ALDH7A1-2'Ome	-0.003474	0.0637572	0.957737
	siRNA-ALDH7A1	siRNA-NC	0.0022045	0.056616	0.96979				siRNA-ALDH7A1	siRNA-NC	-0.061928	0.0637572	0.356773
		siRNA-ALDH7A1-2'Ome	0.0587773	0.056616	0.326276					siRNA-ALDH7A1-2'Ome	-0.065402	0.0637572	0.331766
	siRNA-ALDH7A1-2'Ome	siRNA-NC	-0.0565727	0.056616	0.343786				siRNA-ALDH7A1-2'Ome	siRNA-NC	0.003474	0.0637572	0.957737
		siRNA-ALDH7A1	-0.0587773	0.056616	0.326276					siRNA-ALDH7A1	0.065402	0.0637572	0.331766
24h	siRNA-NC	siRNA-ALDH7A1	.36411*	0.0617159	0.00022915			24h	siRNA-NC	siRNA-ALDH7A1	-0.0590437	0.0608758	0.357435
		siRNA-ALDH7A1-2'Ome	.36385*	0.0617159	0.000230352					siRNA-ALDH7A1-2'Ome	0.00230525	0.0608758	0.97062
	siRNA-ALDH7A1	siRNA-NC	-.36411*	0.0617159	0.00022915				siRNA-ALDH7A1	siRNA-NC	0.0590437	0.0608758	0.357435
		siRNA-ALDH7A1-2'Ome	-0.000260525	0.0617159	0.996724					siRNA-ALDH7A1-2'Ome	0.061349	0.0608758	0.339888
	siRNA-ALDH7A1-2'Ome	siRNA-NC	-.36385*	0.0617159	0.000230352				siRNA-ALDH7A1-2'Ome	siRNA-NC	-0.00230525	0.0608758	0.97062
		siRNA-ALDH7A1	0.000260525	0.0617159	0.996724					siRNA-ALDH7A1	-0.061349	0.0608758	0.339888
48h	siRNA-NC	siRNA-ALDH7A1	.34118*	0.0819512	0.00243585			48h	siRNA-NC	siRNA-ALDH7A1	0.0342125	0.0645859	0.609122
		siRNA-ALDH7A1-2'Ome	.33177*	0.0819512	0.00289218					siRNA-ALDH7A1-2'Ome	0.00917225	0.0645859	0.890195
	siRNA-ALDH7A1	siRNA-NC	-.34118*	0.0819512	0.00243585				siRNA-ALDH7A1	siRNA-NC	-0.0342125	0.0645859	0.609122
		siRNA-ALDH7A1-2'Ome	-0.00941958	0.0819512	0.911015					siRNA-ALDH7A1-2'Ome	-0.0250402	0.0645859	0.707245
	siRNA-ALDH7A1-2'Ome	siRNA-NC	-.33177*	0.0819512	0.00289218				siRNA-ALDH7A1-2'Ome	siRNA-NC	-0.00917225	0.0645859	0.890195
		siRNA-ALDH7A1	0.00941958	0.0819512	0.911015					siRNA-ALDH7A1	0.0250402	0.0645859	0.707245
72h	siRNA-NC	siRNA-ALDH7A1	.28841*	0.0698606	0.00256598			72h	siRNA-NC	siRNA-ALDH7A1	0.0778102	0.0470423	0.132505
		siRNA-ALDH7A1-2'Ome	.29161*	0.0698606	0.00239687					siRNA-ALDH7A1-2'Ome	0.0784295	0.0470423	0.12982
	siRNA-ALDH7A1	siRNA-NC	-.28841*	0.0698606	0.00256598				siRNA-ALDH7A1	siRNA-NC	-0.0778102	0.0470423	0.132505
		siRNA-ALDH7A1-2'Ome	0.0032018	0.0698606	0.964446					siRNA-ALDH7A1-2'Ome	0.00061925	0.0470423	0.989784
	siRNA-ALDH7A1-2'Ome	siRNA-NC	-.29161*	0.0698606	0.00239687				siRNA-ALDH7A1-2'Ome	siRNA-NC	-0.0784295	0.0470423	0.12982
		siRNA-ALDH7A1	-0.0032018	0.0698606	0.964446					siRNA-ALDH7A1	-0.00061925	0.0470423	0.989784
Injection(1μg)								Feeding(1μg)
Time	Group		Difference of means	Standard deviation	P-value			Time	Group		Difference of means	Standard deviation	P-value
8h	siRNA-NC	siRNA-ALDH7A1	.20866*	0.0594133	0.00659863			8h	siRNA-NC	siRNA-ALDH7A1	-0.0686577	0.0460072	0.169812
		siRNA-ALDH7A1-2'Ome	.19650*	0.0594133	0.00912195					siRNA-ALDH7A1-2'Ome	-0.0099065	0.0460072	0.834314
	siRNA-ALDH7A1	siRNA-NC	-.20866*	0.0594133	0.00659863				siRNA-ALDH7A1	siRNA-NC	0.0686577	0.0460072	0.169812
		siRNA-ALDH7A1-2'Ome	-0.0121528	0.0594133	0.842478					siRNA-ALDH7A1-2'Ome	0.0587512	0.0460072	0.233562
	siRNA-ALDH7A1-2'Ome	siRNA-NC	-.19650*	0.0594133	0.00912195				siRNA-ALDH7A1-2'Ome	siRNA-NC	0.0099065	0.0460072	0.834314
		siRNA-ALDH7A1	0.0121528	0.0594133	0.842478					siRNA-ALDH7A1	-0.0587512	0.0460072	0.233562
	siRNA-NC	siRNA-ALDH7A1	.30085*	0.0465739	0.000116815			16h	siRNA-NC	siRNA-ALDH7A1	0.0326002	0.0604312	0.602657
		siRNA-ALDH7A1-2'Ome	.33440*	0.0465739	5.19494e-05					siRNA-ALDH7A1-2'Ome	0.0539827	0.0604312	0.394959
	siRNA-ALDH7A1	siRNA-NC	-.30085*	0.0465739	0.000116815				siRNA-ALDH7A1	siRNA-NC	-0.0326002	0.0604312	0.602657
		siRNA-ALDH7A1-2'Ome	0.0335448	0.0465739	0.489653					siRNA-ALDH7A1-2'Ome	0.0213825	0.0604312	0.731612
	siRNA-ALDH7A1-2'Ome	siRNA-NC	-.33440*	0.0465739	5.19494e-05				siRNA-ALDH7A1-2'Ome	siRNA-NC	-0.0539827	0.0604312	0.394959
		siRNA-ALDH7A1	-0.0335448	0.0465739	0.489653					siRNA-ALDH7A1	-0.0213825	0.0604312	0.731612
24h	siRNA-NC	siRNA-ALDH7A1	.75221*	0.0493001	9.72825e-08			24h	siRNA-NC	siRNA-ALDH7A1	-0.049127	0.0485375	0.337905
		siRNA-ALDH7A1-2'Ome	.74364*	0.0493001	1.0747e-07					siRNA-ALDH7A1-2'Ome	-0.012199	0.0485375	0.807202
	siRNA-ALDH7A1	siRNA-NC	-.75221*	0.0493001	9.72825e-08				siRNA-ALDH7A1	siRNA-NC	0.049127	0.0485375	0.337905
		siRNA-ALDH7A1-2'Ome	-0.00856988	0.0493001	0.865846					siRNA-ALDH7A1-2'Ome	0.036928	0.0485375	0.466233
	siRNA-ALDH7A1-2'Ome	siRNA-NC	-.74364*	0.0493001	1.0747e-07				siRNA-ALDH7A1-2'Ome	siRNA-NC	0.012199	0.0485375	0.807202
		siRNA-ALDH7A1	0.00856988	0.0493001	0.865846					siRNA-ALDH7A1	-0.036928	0.0485375	0.466233
48h	siRNA-NC	siRNA-ALDH7A1	.73314*	0.0639052	1.12835e-06			48h	siRNA-NC	siRNA-ALDH7A1	0.0804223	0.0395584	0.0725818
		siRNA-ALDH7A1-2'Ome	.73950*	0.0639052	1.04863e-06					siRNA-ALDH7A1-2'Ome	-0.0200468	0.0395584	0.624503
	siRNA-ALDH7A1	siRNA-NC	-.73314*	0.0639052	1.12835e-06				siRNA-ALDH7A1	siRNA-NC	-0.0804223	0.0395584	0.0725818
		siRNA-ALDH7A1-2'Ome	0.00636205	0.0639052	0.92288					siRNA-ALDH7A1-2'Ome	-.10047*	0.0395584	0.0317231
	siRNA-ALDH7A1-2'Ome	siRNA-NC	-.73950*	0.0639052	1.04863e-06				siRNA-ALDH7A1-2'Ome	siRNA-NC	0.0200468	0.0395584	0.624503
		siRNA-ALDH7A1	-0.00636205	0.0639052	0.92288					siRNA-ALDH7A1	.10047*	0.0395584	0.0317231
72h	siRNA-NC	siRNA-ALDH7A1	.75716*	0.0502468	1.08416e-07			72h	siRNA-NC	siRNA-ALDH7A1	0.0670323	0.0570506	0.270159
		siRNA-ALDH7A1-2'Ome	.75071*	0.0502468	1.16773e-07					siRNA-ALDH7A1-2'Ome	0.0120128	0.0570506	0.837918
	siRNA-ALDH7A1	siRNA-NC	-.75716*	0.0502468	1.08416e-07				siRNA-ALDH7A1	siRNA-NC	-0.0670323	0.0570506	0.270159
		siRNA-ALDH7A1-2'Ome	-0.0064457	0.0502468	0.900747					siRNA-ALDH7A1-2'Ome	-0.0550195	0.0570506	0.360043
	siRNA-ALDH7A1-2'Ome	siRNA-NC	-.75071*	0.0502468	1.16773e-07				siRNA-ALDH7A1-2'Ome	siRNA-NC	-0.0120128	0.0570506	0.837918
		siRNA-ALDH7A1	0.0064457	0.0502468	0.900747					siRNA-ALDH7A1	0.0550195	0.0570506	0.360043
Injection(2μg)								Feeding(2μg)
Time	Group		Difference of means	Standard deviation	P-value			Time	Group		Difference of means	Standard deviation	P-value
8h	siRNA-NC	siRNA-ALDH7A1	.23136*	0.0706536	0.00961162			8h	siRNA-NC	siRNA-ALDH7A1	0.0703087	0.0453959	0.155841
		siRNA-ALDH7A1-2'Ome	.20398*	0.0706536	0.0179687					siRNA-ALDH7A1-2'Ome	.11504*	0.0453959	0.032013
	siRNA-ALDH7A1	siRNA-NC	-.23136*	0.0706536	0.00961162				siRNA-ALDH7A1	siRNA-NC	-0.0703087	0.0453959	0.155841
		siRNA-ALDH7A1-2'Ome	-0.0273785	0.0706536	0.707389					siRNA-ALDH7A1-2'Ome	0.0447345	0.0453959	0.350162
	siRNA-ALDH7A1-2'Ome	siRNA-NC	-.20398*	0.0706536	0.0179687				siRNA-ALDH7A1-2'Ome	siRNA-NC	-.11504*	0.0453959	0.032013
		siRNA-ALDH7A1	0.0273785	0.0706536	0.707389					siRNA-ALDH7A1	-0.0447345	0.0453959	0.350162
16h	siRNA-NC	siRNA-ALDH7A1	.30341*	0.0681352	0.00159315			16h	siRNA-NC	siRNA-ALDH7A1	0.0175005	0.0536271	0.75163
		siRNA-ALDH7A1-2'Ome	.30517*	0.0681352	0.00153499					siRNA-ALDH7A1-2'Ome	0.094097	0.0536271	0.113211
	siRNA-ALDH7A1	siRNA-NC	-.30341*	0.0681352	0.00159315				siRNA-ALDH7A1	siRNA-NC	-0.0175005	0.0536271	0.75163
		siRNA-ALDH7A1-2'Ome	0.00175683	0.0681352	0.979992					siRNA-ALDH7A1-2'Ome	0.0765965	0.0536271	0.18697
	siRNA-ALDH7A1-2'Ome	siRNA-NC	-.30517*	0.0681352	0.00153499				siRNA-ALDH7A1-2'Ome	siRNA-NC	-0.094097	0.0536271	0.113211
		siRNA-ALDH7A1	-0.00175683	0.0681352	0.979992					siRNA-ALDH7A1	-0.0765965	0.0536271	0.18697
24h	siRNA-NC	siRNA-ALDH7A1	.70077*	0.0486194	1.5945e-07			24h	siRNA-NC	siRNA-ALDH7A1	0.0425777	0.0234214	0.102444
		siRNA-ALDH7A1-2'Ome	.73176*	0.0486194	1.09545e-07					siRNA-ALDH7A1-2'Ome	.16063*	0.0234214	7.40568e-05
	siRNA-ALDH7A1	siRNA-NC	-.70077*	0.0486194	1.5945e-07				siRNA-ALDH7A1	siRNA-NC	-0.0425777	0.0234214	0.102444
		siRNA-ALDH7A1-2'Ome	0.0309941	0.0486194	0.539686					siRNA-ALDH7A1-2'Ome	.11805*	0.0234214	0.00069958
	siRNA-ALDH7A1-2'Ome	siRNA-NC	-.73176*	0.0486194	1.09545e-07				siRNA-ALDH7A1-2'Ome	siRNA-NC	-.16063*	0.0234214	7.40568e-05
		siRNA-ALDH7A1	-0.0309941	0.0486194	0.539686					siRNA-ALDH7A1	-.11805*	0.0234214	0.00069958
48h	siRNA-NC	siRNA-ALDH7A1	.75840*	0.0576684	3.51627e-07			48h	siRNA-NC	siRNA-ALDH7A1	-0.024508	0.03559	0.508422
		siRNA-ALDH7A1-2'Ome	.73088*	0.0576684	4.82819e-07					siRNA-ALDH7A1-2'Ome	.13367*	0.03559	0.00451366
	siRNA-ALDH7A1	siRNA-NC	-.75840*	0.0576684	3.51627e-07				siRNA-ALDH7A1	siRNA-NC	0.024508	0.03559	0.508422
		siRNA-ALDH7A1-2'Ome	-0.0275133	0.0576684	0.644667					siRNA-ALDH7A1-2'Ome	.15818*	0.03559	0.00161299
	siRNA-ALDH7A1-2'Ome	siRNA-NC	-.73088*	0.0576684	4.82819e-07				siRNA-ALDH7A1-2'Ome	siRNA-NC	-.13367*	0.03559	0.00451366
		siRNA-ALDH7A1	0.0275133	0.0576684	0.644667					siRNA-ALDH7A1	-.15818*	0.03559	0.00161299
72h	siRNA-NC	siRNA-ALDH7A1	.69417*	0.0509925	2.61185e-07			72h	siRNA-NC	siRNA-ALDH7A1	-0.0134487	0.0613845	0.831468
		siRNA-ALDH7A1-2'Ome	.74739*	0.0509925	1.37892e-07					siRNA-ALDH7A1-2'Ome	0.1123	0.0613845	0.100584
	siRNA-ALDH7A1	siRNA-NC	-.69417*	0.0509925	2.61185e-07				siRNA-ALDH7A1	siRNA-NC	0.0134487	0.0613845	0.831468
		siRNA-ALDH7A1-2'Ome	0.0532239	0.0509925	0.32382					siRNA-ALDH7A1-2'Ome	0.125748	0.0613845	0.0707813
	siRNA-ALDH7A1-2'Ome	siRNA-NC	-.74739*	0.0509925	1.37892e-07				siRNA-ALDH7A1-2'Ome	siRNA-NC	-0.1123	0.0613845	0.100584
		siRNA-ALDH7A1	-0.0532239	0.0509925	0.32382					siRNA-ALDH7A1	-0.125748	0.0613845	0.0707813
Injection(5μg)								Feeding(5μg)
Time	Group		Difference of means	Standard deviation	P-value			Time	Group		Difference of means	Standard deviation	P-value
8h	siRNA-NC	siRNA-ALDH7A1	.20636*	0.046253	0.00157381			8h	siRNA-NC	siRNA-ALDH7A1	0.0327847	0.0393154	0.425921
		siRNA-ALDH7A1-2'Ome	.21672*	0.046253	0.00114329					siRNA-ALDH7A1-2'Ome	.14929*	0.0393154	0.00423448
	siRNA-ALDH7A1	siRNA-NC	-.20636*	0.046253	0.00157381				siRNA-ALDH7A1	siRNA-NC	-0.0327847	0.0393154	0.425921
		siRNA-ALDH7A1-2'Ome	0.0103603	0.046253	0.827767					siRNA-ALDH7A1-2'Ome	.11651*	0.0393154	0.0158697
	siRNA-ALDH7A1-2'Ome	siRNA-NC	-.21672*	0.046253	0.00114329				siRNA-ALDH7A1-2'Ome	siRNA-NC	-.14929*	0.0393154	0.00423448
		siRNA-ALDH7A1	-0.0103603	0.046253	0.827767					siRNA-ALDH7A1	-.11651*	0.0393154	0.0158697
	siRNA-NC	siRNA-ALDH7A1	.25959*	0.0454308	0.000289185			16h	siRNA-NC	siRNA-ALDH7A1	0.0486857	0.0900638	0.601924
		siRNA-ALDH7A1-2'Ome	.26738*	0.0454308	0.000233248					siRNA-ALDH7A1-2'Ome	.49442*	0.0900638	0.000385302
	siRNA-ALDH7A1	siRNA-NC	-.25959*	0.0454308	0.000289185				siRNA-ALDH7A1	siRNA-NC	-0.0486857	0.0900638	0.601924
		siRNA-ALDH7A1-2'Ome	0.0077939	0.0454308	0.867582					siRNA-ALDH7A1-2'Ome	.44574*	0.0900638	0.000792272
	siRNA-ALDH7A1-2'Ome	siRNA-NC	-.26738*	0.0454308	0.000233248				siRNA-ALDH7A1-2'Ome	siRNA-NC	-.49442*	0.0900638	0.000385302
		siRNA-ALDH7A1	-0.0077939	0.0454308	0.867582					siRNA-ALDH7A1	-.44574*	0.0900638	0.000792272
24h	siRNA-NC	siRNA-ALDH7A1	.68481*	0.025749	7.26331e-10			24h	siRNA-NC	siRNA-ALDH7A1	-0.0584448	0.0884952	0.52552
		siRNA-ALDH7A1-2'Ome	.69016*	0.025749	6.77692e-10					siRNA-ALDH7A1-2'Ome	.53691*	0.0884952	0.000186558
	siRNA-ALDH7A1	siRNA-NC	-.68481*	0.025749	7.26331e-10				siRNA-ALDH7A1	siRNA-NC	0.0584448	0.0884952	0.52552
		siRNA-ALDH7A1-2'Ome	0.00535535	0.025749	0.839873					siRNA-ALDH7A1-2'Ome	.59535*	0.0884952	8.58086e-05
	siRNA-ALDH7A1-2'Ome	siRNA-NC	-.69016*	0.025749	6.77692e-10				siRNA-ALDH7A1-2'Ome	siRNA-NC	-.53691*	0.0884952	0.000186558
		siRNA-ALDH7A1	-0.00535535	0.025749	0.839873					siRNA-ALDH7A1	-.59535*	0.0884952	8.58086e-05
48h	siRNA-NC	siRNA-ALDH7A1	.71679*	0.0475697	1.08455e-07			48h	siRNA-NC	siRNA-ALDH7A1	0.00675075	0.0736082	0.928936
		siRNA-ALDH7A1-2'Ome	.70221*	0.0475697	1.29639e-07					siRNA-ALDH7A1-2'Ome	.49345*	0.0736082	8.81659e-05
	siRNA-ALDH7A1	siRNA-NC	-.71679*	0.0475697	1.08455e-07				siRNA-ALDH7A1	siRNA-NC	-0.00675075	0.0736082	0.928936
		siRNA-ALDH7A1-2'Ome	-0.0145806	0.0475697	0.766189					siRNA-ALDH7A1-2'Ome	.48670*	0.0736082	9.79174e-05
	siRNA-ALDH7A1-2'Ome	siRNA-NC	-.70221*	0.0475697	1.29639e-07				siRNA-ALDH7A1-2'Ome	siRNA-NC	-.49345*	0.0736082	8.81659e-05
		siRNA-ALDH7A1	0.0145806	0.0475697	0.766189					siRNA-ALDH7A1	-.48670*	0.0736082	9.79174e-05
72h	siRNA-NC	siRNA-ALDH7A1	.70300*	0.0285868	1.45711e-09			72h	siRNA-NC	siRNA-ALDH7A1	0.060591	0.0496117	0.252997
		siRNA-ALDH7A1-2'Ome	.72306*	0.0285868	1.13489e-09					siRNA-ALDH7A1-2'Ome	.45924*	0.0496117	6.77895e-06
	siRNA-ALDH7A1	siRNA-NC	-.70300*	0.0285868	1.45711e-09				siRNA-ALDH7A1	siRNA-NC	-0.060591	0.0496117	0.252997
		siRNA-ALDH7A1-2'Ome	0.0200593	0.0285868	0.500608					siRNA-ALDH7A1-2'Ome	.39865*	0.0496117	2.13656e-05
	siRNA-ALDH7A1-2'Ome	siRNA-NC	-.72306*	0.0285868	1.13489e-09				siRNA-ALDH7A1-2'Ome	siRNA-NC	-.45924*	0.0496117	6.77895e-06
		siRNA-ALDH7A1	-0.0200593	0.0285868	0.500608					siRNA-ALDH7A1	-.39865*	0.0496117	2.13656e-05
Injection(10μg)								Feeding(10μg)
Time	Group		Difference of means	Standard deviation	P-value			Time	Group		Difference of means	Standard deviation	P-value
8h	siRNA-NC	siRNA-ALDH7A1	.20779*	0.0346628	0.000203873			8h	siRNA-NC	siRNA-ALDH7A1	0.0171177	0.034071	0.627439
		siRNA-ALDH7A1-2'Ome	.20194*	0.0346628	0.000251261					siRNA-ALDH7A1-2'Ome	.24294*	0.034071	5.48214e-05
	siRNA-ALDH7A1	siRNA-NC	-.20779*	0.0346628	0.000203873				siRNA-ALDH7A1	siRNA-NC	-0.0171177	0.034071	0.627439
		siRNA-ALDH7A1-2'Ome	-0.0058505	0.0346628	0.8697					siRNA-ALDH7A1-2'Ome	.22582*	0.034071	9.61352e-05
	siRNA-ALDH7A1-2'Ome	siRNA-NC	-.20194*	0.0346628	0.000251261				siRNA-ALDH7A1-2'Ome	siRNA-NC	-.24294*	0.034071	5.48214e-05
		siRNA-ALDH7A1	0.0058505	0.0346628	0.8697					siRNA-ALDH7A1	-.22582*	0.034071	9.61352e-05
16h	siRNA-NC	siRNA-ALDH7A1	.36887*	0.0328549	1.3547e-06			16h	siRNA-NC	siRNA-ALDH7A1	0.029962	0.0542815	0.594405
		siRNA-ALDH7A1-2'Ome	.32791*	0.0328549	3.63692e-06					siRNA-ALDH7A1-2'Ome	.69444*	0.0542815	4.4556e-07
	siRNA-ALDH7A1	siRNA-NC	-.36887*	0.0328549	1.3547e-06				siRNA-ALDH7A1	siRNA-NC	-0.029962	0.0542815	0.594405
		siRNA-ALDH7A1-2'Ome	-0.0409606	0.0328549	0.243972					siRNA-ALDH7A1-2'Ome	.66447*	0.0542815	6.49784e-07
	siRNA-ALDH7A1-2'Ome	siRNA-NC	-.32791*	0.0328549	3.63692e-06				siRNA-ALDH7A1-2'Ome	siRNA-NC	-.69444*	0.0542815	4.4556e-07
		siRNA-ALDH7A1	0.0409606	0.0328549	0.243972					siRNA-ALDH7A1	-.66447*	0.0542815	6.49784e-07
24h	siRNA-NC	siRNA-ALDH7A1	.75178*	0.0391909	1.31154e-08			24h	siRNA-NC	siRNA-ALDH7A1	-0.0487902	0.0759699	0.536737
		siRNA-ALDH7A1-2'Ome	.73069*	0.0391909	1.6847e-08					siRNA-ALDH7A1-2'Ome	.74777*	0.0759699	4.08148e-06
	siRNA-ALDH7A1	siRNA-NC	-.75178*	0.0391909	1.31154e-08				siRNA-ALDH7A1	siRNA-NC	0.0487902	0.0759699	0.536737
		siRNA-ALDH7A1-2'Ome	-0.0210913	0.0391909	0.603513					siRNA-ALDH7A1-2'Ome	.79656*	0.0759699	2.40884e-06
	siRNA-ALDH7A1-2'Ome	siRNA-NC	-.73069*	0.0391909	1.6847e-08				siRNA-ALDH7A1-2'Ome	siRNA-NC	-.74777*	0.0759699	4.08148e-06
		siRNA-ALDH7A1	0.0210913	0.0391909	0.603513					siRNA-ALDH7A1	-.79656*	0.0759699	2.40884e-06
48h	siRNA-NC	siRNA-ALDH7A1	.70429*	0.0337888	6.30411e-09			48h	siRNA-NC	siRNA-ALDH7A1	0.0329145	0.0545213	0.560949
		siRNA-ALDH7A1-2'Ome	.67447*	0.0337888	9.23515e-09					siRNA-ALDH7A1-2'Ome	.72003*	0.0545213	3.3914e-07
	siRNA-ALDH7A1	siRNA-NC	-.70429*	0.0337888	6.30411e-09				siRNA-ALDH7A1	siRNA-NC	-0.0329145	0.0545213	0.560949
		siRNA-ALDH7A1-2'Ome	-0.029816	0.0337888	0.400502					siRNA-ALDH7A1-2'Ome	.68712*	0.0545213	5.06674e-07
	siRNA-ALDH7A1-2'Ome	siRNA-NC	-.67447*	0.0337888	9.23515e-09				siRNA-ALDH7A1-2'Ome	siRNA-NC	-.72003*	0.0545213	3.3914e-07
		siRNA-ALDH7A1	0.029816	0.0337888	0.400502					siRNA-ALDH7A1	-.68712*	0.0545213	5.06674e-07
72h	siRNA-NC	siRNA-ALDH7A1	.73682*	0.0364442	8.25216e-09			72h	siRNA-NC	siRNA-ALDH7A1	0.0224928	0.0710868	0.758905
		siRNA-ALDH7A1-2'Ome	.72976*	0.0364442	8.98353e-09					siRNA-ALDH7A1-2'Ome	.73545*	0.0710868	2.69436e-06
	siRNA-ALDH7A1	siRNA-NC	-.73682*	0.0364442	8.25216e-09				siRNA-ALDH7A1	siRNA-NC	-0.0224928	0.0710868	0.758905
		siRNA-ALDH7A1-2'Ome	-0.00705833	0.0364442	0.850731					siRNA-ALDH7A1-2'Ome	.71296*	0.0710868	3.49174e-06
	siRNA-ALDH7A1-2'Ome	siRNA-NC	-.72976*	0.0364442	8.98353e-09				siRNA-ALDH7A1-2'Ome	siRNA-NC	-.73545*	0.0710868	2.69436e-06
		siRNA-ALDH7A1	0.00705833	0.0364442	0.850731					siRNA-ALDH7A1	-.71296*	0.0710868	3.49174e-06
Injection(15μg)								Feeding(15μg)
Time	Group		Difference of means	Standard deviation	P-value			Time	Group		Difference of means	Standard deviation	P-value
8h	siRNA-NC	siRNA-ALDH7A1	.20672*	0.0569687	0.00549733			8h	siRNA-NC	siRNA-ALDH7A1	0.011282	0.0332364	0.74206
		siRNA-ALDH7A1-2'Ome	.21042*	0.0569687	0.00496998					siRNA-ALDH7A1-2'Ome	.25582*	0.0332364	3.00931e-05
	siRNA-ALDH7A1	siRNA-NC	-.20672*	0.0569687	0.00549733				siRNA-ALDH7A1	siRNA-NC	-0.011282	0.0332364	0.74206
		siRNA-ALDH7A1-2'Ome	0.00369825	0.0569687	0.949659					siRNA-ALDH7A1-2'Ome	.24454*	0.0332364	4.2927e-05
	siRNA-ALDH7A1-2'Ome	siRNA-NC	-.21042*	0.0569687	0.00496998				siRNA-ALDH7A1-2'Ome	siRNA-NC	-.25582*	0.0332364	3.00931e-05
		siRNA-ALDH7A1	-0.00369825	0.0569687	0.949659					siRNA-ALDH7A1	-.24454*	0.0332364	4.2927e-05
16h	siRNA-NC	siRNA-ALDH7A1	.33551*	0.0453333	4.09938e-05			16h	siRNA-NC	siRNA-ALDH7A1	-0.0171488	0.0571618	0.770988
		siRNA-ALDH7A1-2'Ome	.30471*	0.0453333	8.63976e-05					siRNA-ALDH7A1-2'Ome	.72062*	0.0571618	5.05292e-07
	siRNA-ALDH7A1	siRNA-NC	-.33551*	0.0453333	4.09938e-05				siRNA-ALDH7A1	siRNA-NC	0.0171488	0.0571618	0.770988
		siRNA-ALDH7A1-2'Ome	-0.0308006	0.0453333	0.513961					siRNA-ALDH7A1-2'Ome	.73777*	0.0571618	4.13048e-07
	siRNA-ALDH7A1-2'Ome	siRNA-NC	-.30471*	0.0453333	8.63976e-05				siRNA-ALDH7A1-2'Ome	siRNA-NC	-.72062*	0.0571618	5.05292e-07
		siRNA-ALDH7A1	0.0308006	0.0453333	0.513961					siRNA-ALDH7A1	-.73777*	0.0571618	4.13048e-07
24h	siRNA-NC	siRNA-ALDH7A1	.73666*	0.0238882	1.94249e-10			24h	siRNA-NC	siRNA-ALDH7A1	0.00308075	0.0718031	0.966714
		siRNA-ALDH7A1-2'Ome	.74401*	0.0238882	1.77793e-10					siRNA-ALDH7A1-2'Ome	.74067*	0.0718031	2.76178e-06
	siRNA-ALDH7A1	siRNA-NC	-.73666*	0.0238882	1.94249e-10				siRNA-ALDH7A1	siRNA-NC	-0.00308075	0.0718031	0.966714
		siRNA-ALDH7A1-2'Ome	0.00734372	0.0238882	0.765518					siRNA-ALDH7A1-2'Ome	.73759*	0.0718031	2.85969e-06
	siRNA-ALDH7A1-2'Ome	siRNA-NC	-.74401*	0.0238882	1.77793e-10				siRNA-ALDH7A1-2'Ome	siRNA-NC	-.74067*	0.0718031	2.76178e-06
		siRNA-ALDH7A1	-0.00734372	0.0238882	0.765518					siRNA-ALDH7A1	-.73759*	0.0718031	2.85969e-06
48h	siRNA-NC	siRNA-ALDH7A1	.76542*	0.0472141	5.73572e-08			48h	siRNA-NC	siRNA-ALDH7A1	-0.0516777	0.0595772	0.40825
		siRNA-ALDH7A1-2'Ome	.71438*	0.0472141	1.04625e-07					siRNA-ALDH7A1-2'Ome	.72716*	0.0595772	6.6631e-07
	siRNA-ALDH7A1	siRNA-NC	-.76542*	0.0472141	5.73572e-08				siRNA-ALDH7A1	siRNA-NC	0.0516777	0.0595772	0.40825
		siRNA-ALDH7A1-2'Ome	-0.0510403	0.0472141	0.307794					siRNA-ALDH7A1-2'Ome	.77883*	0.0595772	3.70141e-07
	siRNA-ALDH7A1-2'Ome	siRNA-NC	-.71438*	0.0472141	1.04625e-07				siRNA-ALDH7A1-2'Ome	siRNA-NC	-.72716*	0.0595772	6.6631e-07
		siRNA-ALDH7A1	0.0510403	0.0472141	0.307794					siRNA-ALDH7A1	-.77883*	0.0595772	3.70141e-07
72h	siRNA-NC	siRNA-ALDH7A1	.73289*	0.0383885	1.36773e-08			72h	siRNA-NC	siRNA-ALDH7A1	0.0753622	0.0473854	0.146206
		siRNA-ALDH7A1-2'Ome	.72610*	0.0383885	1.48451e-08					siRNA-ALDH7A1-2'Ome	.72325*	0.0473854	9.69922e-08
	siRNA-ALDH7A1	siRNA-NC	-.73289*	0.0383885	1.36773e-08				siRNA-ALDH7A1	siRNA-NC	-0.0753622	0.0473854	0.146206
		siRNA-ALDH7A1-2'Ome	-0.0067911	0.0383885	0.8635					siRNA-ALDH7A1-2'Ome	.64788*	0.0473854	2.51556e-07
	siRNA-ALDH7A1-2'Ome	siRNA-NC	-.72610*	0.0383885	1.48451e-08				siRNA-ALDH7A1-2'Ome	siRNA-NC	-.72325*	0.0473854	9.69922e-08
		siRNA-ALDH7A1	0.0067911	0.0383885	0.8635					siRNA-ALDH7A1	-.64788*	0.0473854	2.51556e-07
